# Supplementary material for: The effect of antihypertensive treatment on headache and blood pressure variability in randomized controlled trials: a systematic review
Source: Springer Nature journal article supplement (doi:10.1007/s00415-012-6449-y), 2012-02-21
Supplement: MOESM1 [file 415_2012_6449_MOESM1_ESM.pdf]

**The effect of antihypertensive treatment on headache and blood pressure variability in  
randomised controlled trials: a systematic review**

Alastair John Stewart Webb BMBCh, Peter Malcolm Rothwell FMedSci

Stroke Prevention Research Unit, Department of Clinical Neurology,

University of Oxford

**Authors:**

Dr AJS Webb, Stroke Prevention Research Unit, Oxford University, [alastair.webb@clneuro.ox.ac.uk](mailto:alastair.webb@clneuro.ox.ac.uk)

Prof PM Rothwell, Stroke Prevention Research Unit, Oxford University, [peter.rothwell@clneuro.ox.ac.uk](mailto:peter.rothwell@clneuro.ox.ac.uk)

**Correspondence to:**

Prof P M Rothwell

Stroke Prevention Research Unit,

Department of Clinical Neurology

John Radcliffe Hospital

Headington

Oxford OX3 9DU

United Kingdom

TEL: (44) 1865 231610

E-mail: [peter.rothwell@clneuro.ox.ac.uk](mailto:peter.rothwell@clneuro.ox.ac.uk)

**Webfigure 1. Effect of class of antihypertensive agent on incidence of headache compared to other antihypertensive classes or placebo, different CCB classes analysed separately**

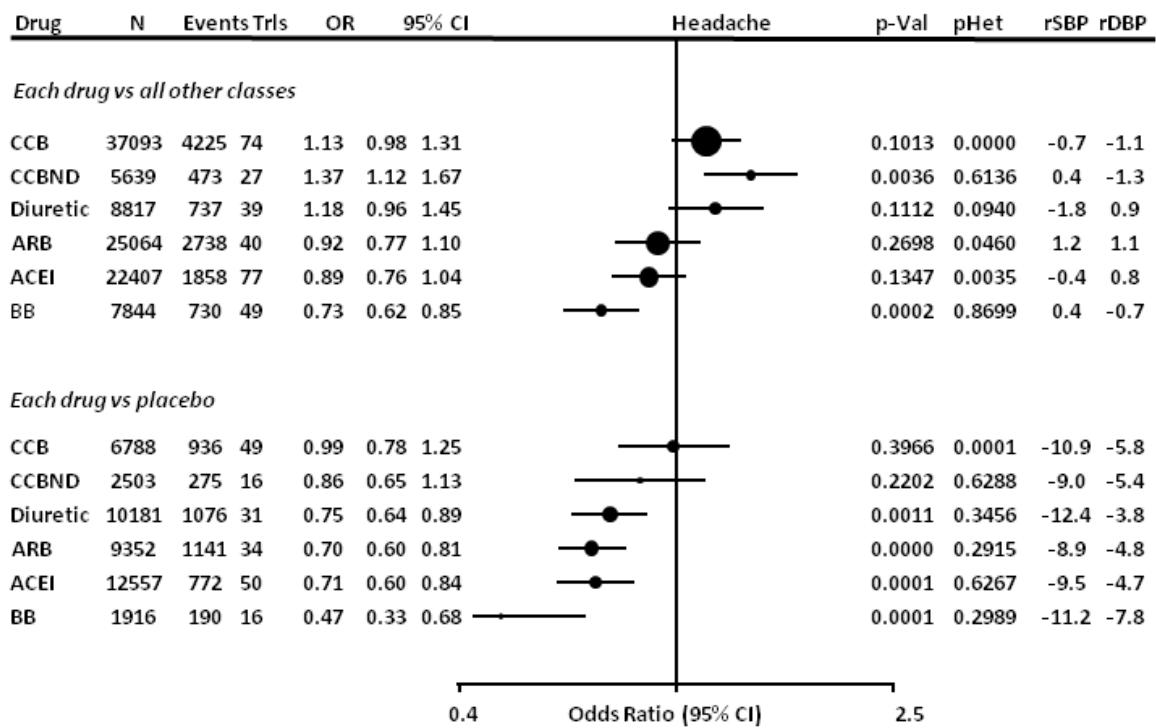

**Webfigure 2. Effect of class of antihypertensive agent on incidence of headache and variability in SBP compared to other antihypertensive classes or placebo, limited to trials of 26 weeks duration or less. A) Effect on incidence of headache. B) Effect on variability in SBP.**

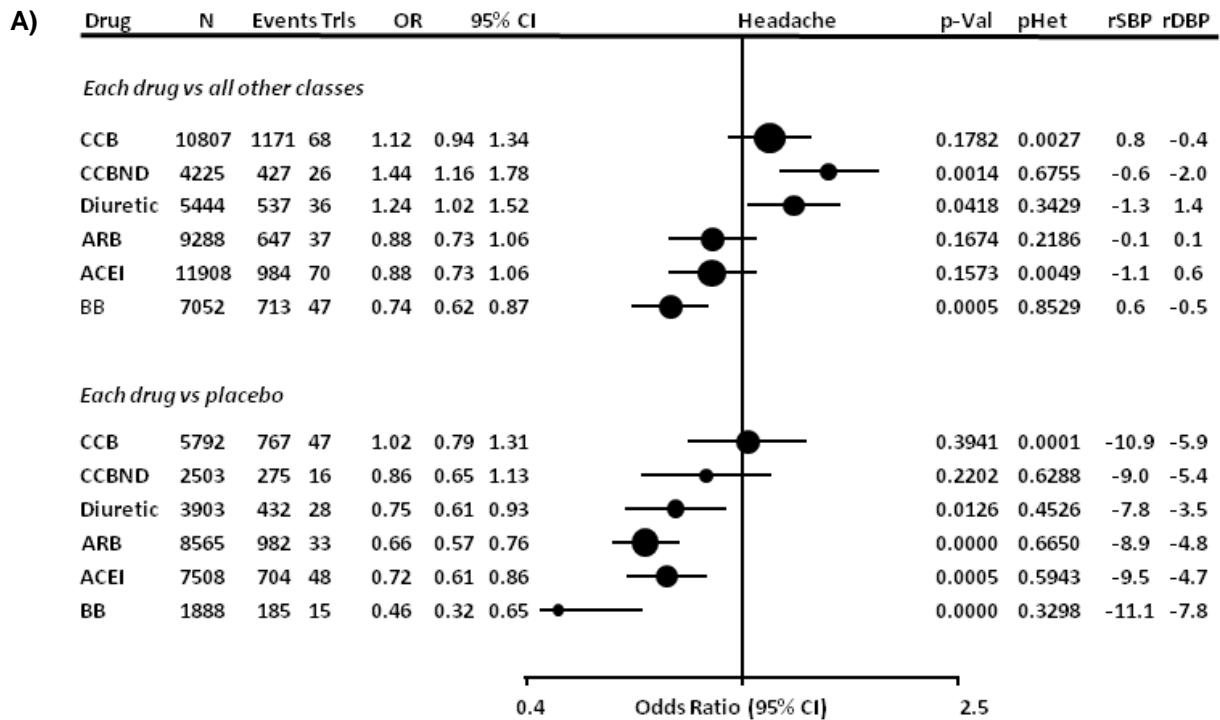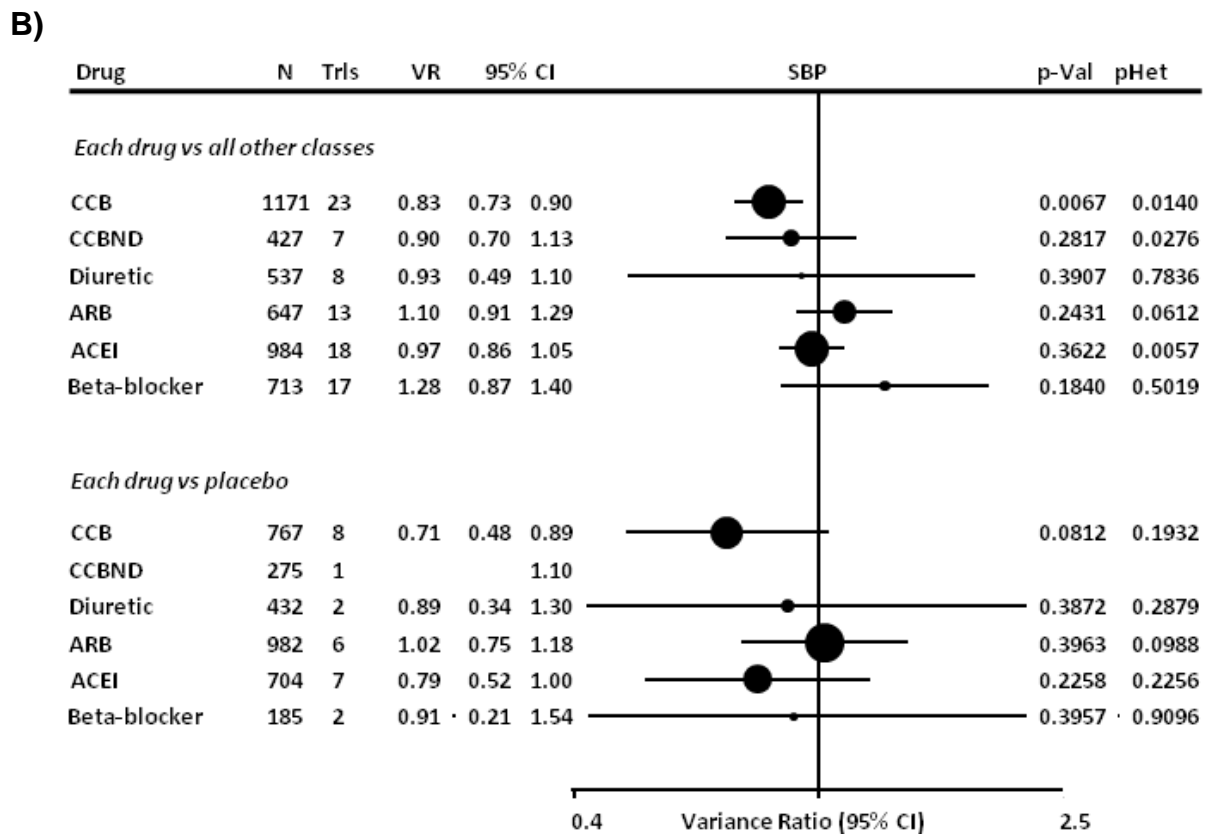

**Webfigure 3. Effect of class of antihypertensive agent on incidence of headache compared to other antihypertensive classes or placebo in trials reporting the incidence of new-onset headache or headache felt to be drug-related.**

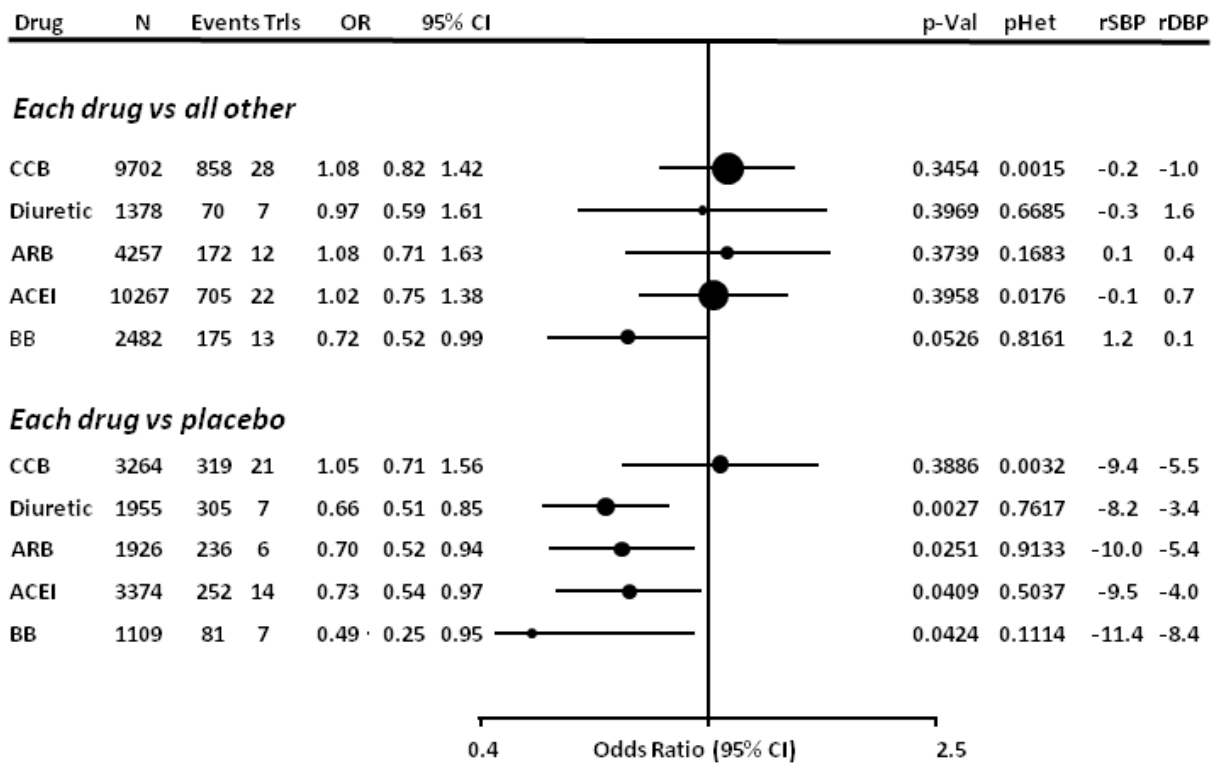

**Webfigure 4. Effect of class of antihypertensive agent on difference in variability in DBP at follow-up compared to other antihypertensive classes or placebo.**

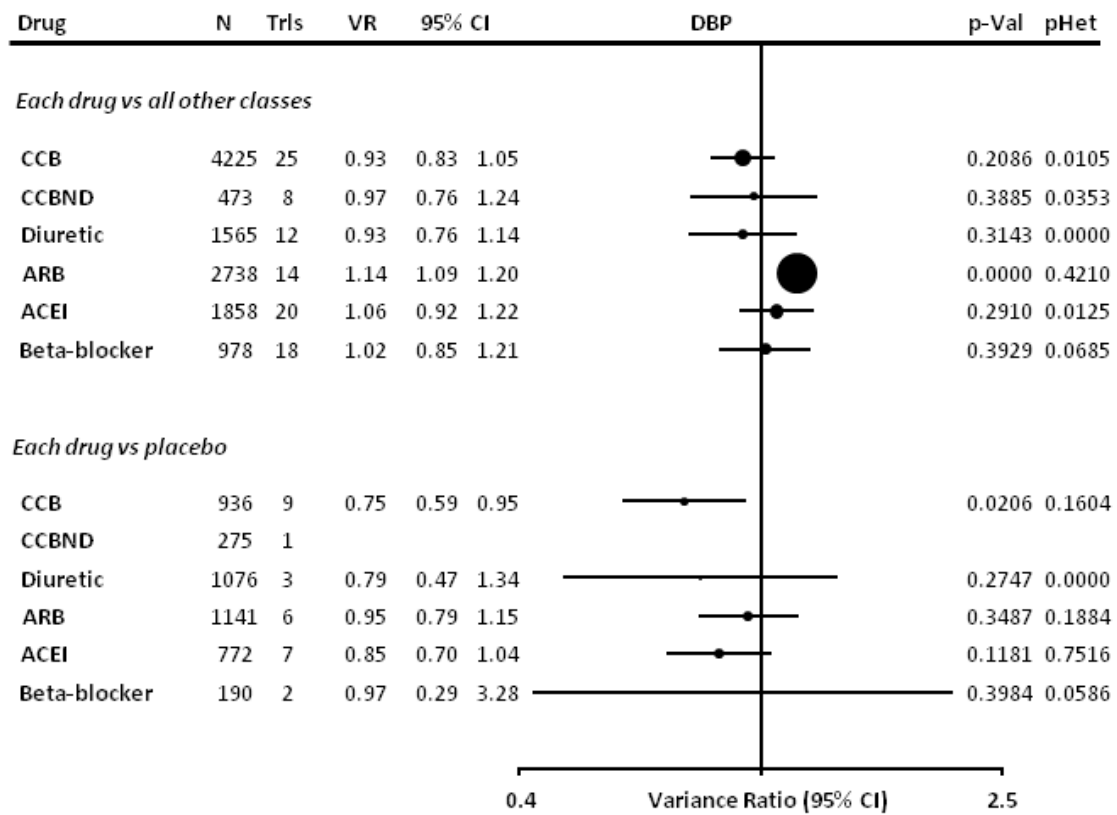

**Webfigure 5. Effect of different non-dihydropyridine calcium channel blockers on on incidence of headache compared to other antihypertensive classes or placebo.**

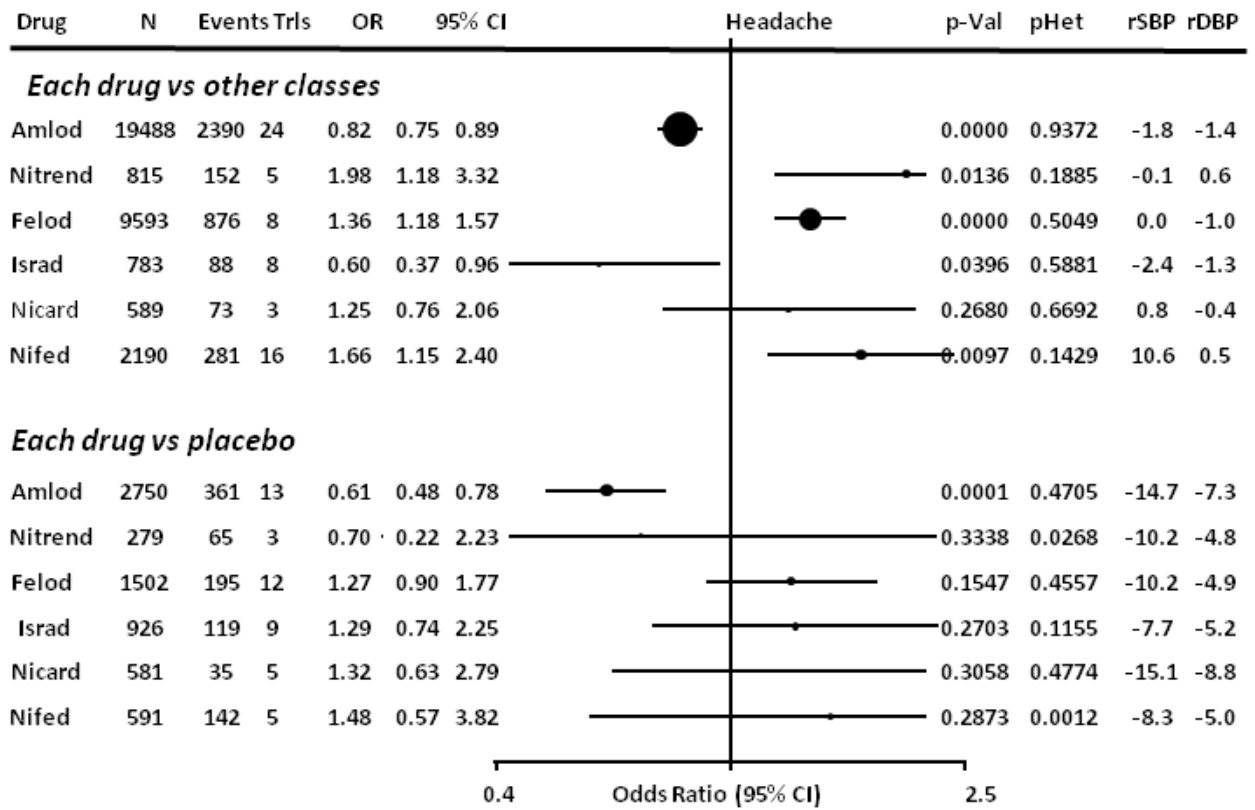

**Webfigure 6. Effect of class of antihypertensive agent on incidence of headache and variability in SBP compared to other antihypertensive classes or placebo, excluding amlodipine. A) Effect on incidence of headache. B) Effect on variability in SBP.**

**A)**

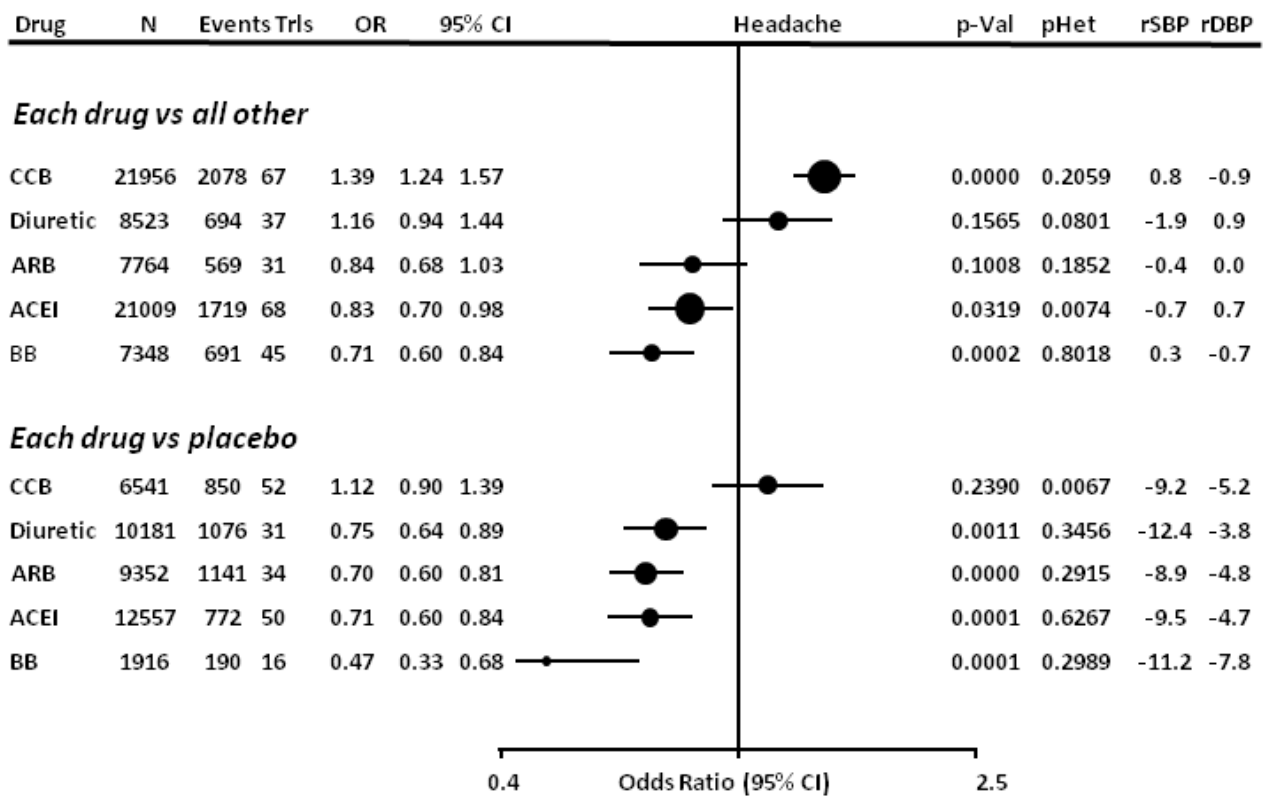

**B)**

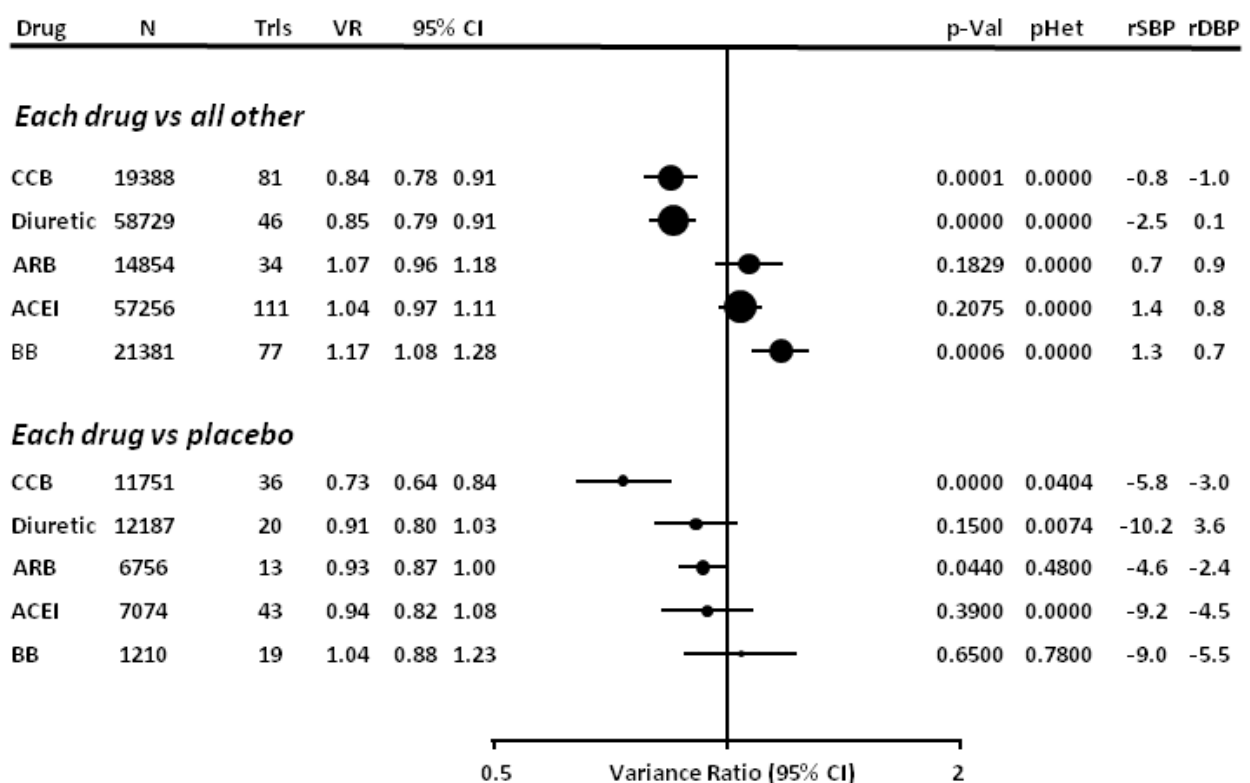

**Webtable 1. Trials included in meta-analyses.**

|     | Reference                                                                                                                                                                                                                                                                                   | Name      | VR | OR |
|-----|---------------------------------------------------------------------------------------------------------------------------------------------------------------------------------------------------------------------------------------------------------------------------------------------|-----------|----|----|
| 1.  | ABC et al. Evaluation of candesartan cilexetil in black patients with systemic hypertension: the ABC Trial. <i>Heart Dis.</i> 2000; 2: 392                                                                                                                                                  |           |    | X  |
| 2.  | Aberg et al. Different long-term metabolic effects of enalapril and atenolol in patients with mild hypertension. EGTA Group. <i>J Hum Hypertens</i> 1995; 9.2: 149                                                                                                                          |           | X  |    |
| 3.  | Acbay et al. Effects of low-dose losartan treatment on persistent microalbuminuria in normotensive type 1 diabetic subjects. <i>J Endocrinol Invest</i> 2001; 24: 608                                                                                                                       |           | X  |    |
| 4.  | Agabiti-Rosei et al. Cardiovascular structural changes and calcium antagonist therapy in patients with hypertension. <i>J Cardiovasc Pharmacol</i> 1994; 24 S A: S37                                                                                                                        |           | X  | X  |
| 5.  | Agabiti-Rosei et al. Efficacy and tolerability of moexipril and nitrendipine in postmenopausal women with hypertension. MADAM study group. Moexipril as Antihypertensive Drug After Menopause. <i>Eur J Clin Pharmacol</i> 1999; 55: 185                                                    |           | X  |    |
| 6.  | Agabiti-Rosei et al. Evaluation of the Efficacy and Tolerability of Nebivolol versus Lisinopril in the Treatment of Essential Arterial Hypertension: A Randomized, Multicentre, Double-blind Study <i>Blood Press</i> 2003; 12 s 1: 30                                                      |           | X  |    |
| 7.  | Agardh et al. Greater reduction of urinary albumin excretion in hypertensive type II diabetic patients with incipient nephropathy by lisinopril than by nifedipine. <i>J Hum Hypertens</i> 1996; 10: 185                                                                                    |           | X  | X  |
| 8.  | Ahmad et al. Effect of 5-year enalapril therapy on progression of microalbuminuria and glomerular structural changes in type 1 diabetic subjects. <i>Diabetes Clin Res</i> 2003; 60: 131                                                                                                    |           | X  |    |
| 9.  | Ahmad et al. Effective postponement of diabetic nephropathy with enalapril in normotensive type 2 diabetic patients with microalbuminuria. <i>Diabetes Care</i> 1997; 20: 1576                                                                                                              |           | X  |    |
| 10. | Albergati et al. Comparison of the effects of carvedilol and nifedipine in patients with essential hypertension and non-insulin dependent diabetes mellitus. <i>J Cardiovasc Pharmacol</i> 1998; 19: 86                                                                                     |           | X  |    |
| 11. | ALLHAT Investigators. Diuretic Versus alpha-Blocker as First-Step Antihypertensive Therapy: Final Results From the Antihypertensive and Lipid-Lowering Treatment to Prevent Heart Attack Trial (ALLHAT) <i>Hypertension</i> 2003; 42: 239                                                   | ALLHAT I  | X  |    |
| 12. | ALLHAT investigators. Major outcomes in high-risk hypertensive patients randomized to angiotensin-converting enzyme inhibitor or calcium channel blocker vs diuretic: The Antihypertensive and Lipid-Lowering Treatment to Prevent Heart Attack Trial (ALLHAT). <i>JAMA</i> 2002; 288: 2981 | ALLHAT II | X  |    |
| 13. | Amery et al. Mortality and morbidity results from the European Working Party on High Blood Pressure in the Elderly trial. <i>Lancet</i> 1985; 1: 1349                                                                                                                                       | EWPHE     | X  |    |
| 14. | Andersson et al. The antihypertensive effect and tolerability of candesartan cilexetil, a new generation angiotensin II antagonist, in comparison with losartan <i>Blood Press</i> 1998; 7: 53                                                                                              |           | X  | X  |
| 15. | Apperloo et al. Differential effects of enalapril and atenolol on proteinuria and renal haemodynamics in non-diabetic renal disease. <i>BMJ</i> 1991; 303: 821                                                                                                                              |           | X  |    |
| 16. | Applegate et al. A randomized controlled trial of the effects of three antihypertensive agents on blood pressure control and                                                                                                                                                                |           |    | X  |



|                                                                                                                                                                                                                                        |   |   |
|----------------------------------------------------------------------------------------------------------------------------------------------------------------------------------------------------------------------------------------|---|---|
| quality of life in older women. <i>Arch Intern Med.</i> 1991; 151: 1817                                                                                                                                                                |   |   |
| 17. Applegate et al. Evaluation of blood pressure response to the combination of enalapril (single dose) and diltiazem ER (four different doses) in systemic hypertension. <i>Am J Cardiol</i> 1996; 78: 51                            | X |   |
| 18. Armentano et al. Mechanical vs intrinsic components in the improvement of brachial arterial compliance. Comparison of the effects of atenolol versus ramipril in hypertensive patients <i>Medicina (B Aires)</i> 2001; 61 5.1: 535 | X |   |
| 19. Arora et al. Assessment of left ventricular changes in systemic hypertension--before and after therapy. <i>Indian Heart J</i> 1984; 36: 155                                                                                        | X |   |
| 20. Asmar et al. Effect of bisoprolol on blood pressure and arterial hemodynamics in systemic hypertension. <i>Am J Cardiol</i> 1991; 68: 61                                                                                           | X |   |
| 21. Asselbergs et al. Effects of fosinopril and pravastatin on cardiovascular events in subjects with microalbuminuria <i>Circulation</i> 2004; 110: 2809                                                                              | X |   |
| 22. Aurell et al. Enalapril versus metoprolol in primary hypertension--effects on the glomerular filtration rate. <i>Nephrol Dial transplant</i> 1997; 12: 2289                                                                        | X |   |
| 23. Baez et al. Antihypertensive effect of doxazosin in hypertensive patients: comparison with atenolol. <i>Br J Clin Pharmacol</i> 1986; 21 s 1: 63S                                                                                  | X | X |
| 24. Bahena et al. Quinapril versus atenolol in the treatment of mild to moderate essential hypertension. <i>Clin Ther</i> 1992; 14: 527                                                                                                | X | X |
| 25. Bainbridge et al. The antihypertensive efficacy and tolerability of a low dose combination of ramipril and felodipine ER in mild to moderate essential hypertension. <i>Br J Clin Pharmacol.</i> 1993; 36: 323                     |   | X |
| 26. Bakris et al. <i>Bakris Kidney Int</i> 1998; 54: 1283                                                                                                                                                                              | X |   |
| 27. Bakris et al. Differences in glucose tolerance between fixed-dose antihypertensive drug combinations in people with metabolic syndrome. <i>Diabetes Care</i> 2006; 29: 2592                                                        | X |   |
| 28. Barenbrock et al. Effect of lisinopril and metoprolol on arterial distensibility. <i>Hypertension</i> 1994; 23: 161                                                                                                                | X |   |
| 29. Beevers et al. Comparison of lisinopril versus atenolol for mild to moderate essential hypertension <i>Am J Cardiol.</i> 1991; 67.1: 59                                                                                            |   | X |
| 30. Bell et al. Effective dose range of candesartan cilexetil for systemic hypertension. Candesartan Cilexetil Study Investigators. <i>Am J Cardiol.</i> 1999; 83: 272                                                                 |   | X |
| 31. Belz et al. [Cilazapril in essential hypertension. A placebo-controlled double-blind study to establish the dosage] <i>Medizinische Klinik</i> 1986; 81: 524                                                                       | X |   |
| 32. Benetos et al. Efficacy, safety, and effects on quality of life of bisoprolol/hydrochlorothiazide versus amlodipine in elderly patients with systolic hypertension. <i>Am Heart J</i> 2000; 140: E11                               | X |   |
| 33. Berglund et al. Low Doses of Hydrochlorothiazide in Hypertension. Antihypertensive and Metabolic Effects. <i>Eur J Clin Pharmacol</i> 1976; 10: 177                                                                                | X |   |
| 34. Bergstrand et al. Comparative study of metoprolol and alpha-methyldopa in untreated essential hypertension <i>Eur J Clin Pharmacol</i> 1976; 10: 375                                                                               | X |   |
| 35. Bielen et al. Comparison of the effects of isradipine and lisinopril on left ventricular structure and function in essential hypertension <i>Am J Cardiol</i> 1992; 69: 1200                                                       | X |   |
| 36. Bjorck et al. Contrasting effects of enalapril and metoprolol on proteinuria in diabetic nephropathy. <i>BMJ</i> 1990; 300: 904                                                                                                    | X |   |

|                                                                                                                                                                                                                                                                                                |   |   |
|------------------------------------------------------------------------------------------------------------------------------------------------------------------------------------------------------------------------------------------------------------------------------------------------|---|---|
| 37. Bjorck et al. Renal protective effect of enalapril in diabetic nephropathy. <i>BMJ</i> 1992; 304: 339                                                                                                                                                                                      | X |   |
| 38. Black et al. One-year study of felodipine or placebo for stage 1 isolated systolic hypertension. <i>Hypertension</i> 2001; 38: 1118                                                                                                                                                        | X | X |
| 39. Bobrie et al. A home blood pressure monitoring study comparing the antihypertensive efficacy of two angiotensin II receptor antagonist fixed combinations. <i>J Hypertens</i> 2005; 18.11: 1482                                                                                            | X |   |
| 40. Bojestig et al. Reduction of ACE activity is insufficient to decrease microalbuminuria in normotensive patients with type 1 diabetes. <i>Diab Care</i> 2001; 24: 919                                                                                                                       | X |   |
| 41. Bonaduce et al. Twenty-four-hour blood pressure monitoring during treatment with extended-release felodipine versus slow-release nifedipine in elderly patients with mild to moderate hypertension: a randomized, double-blind, cross-over study. <i>Eur J Clin Pharmacol</i> 1997; 53: 95 | X |   |
| 42. Bossini et al. Felodipine ER formulation in the treatment of mild hypertension: efficacy and tolerability vs placebo. <i>Br J Clin Pharmacol</i> 1990; 30: 567                                                                                                                             | X |   |
| 43. Boutouyrie et al. Local pulse pressure and regression of arterial wall hypertrophy during long-term antihypertensive treatment. <i>Circulation</i> 2000; 101: 2601                                                                                                                         | X |   |
| 44. Boydak et al. A Randomised Comparison of the Effects of Nebivolol and Atenolol with and without Chlorthalidone on the Sexual Function of Hypertensive Men <i>Clin Drug Invest</i> 2005; 25: 409                                                                                            | X |   |
| 45. Breed et al. Quality of life perception during antihypertensive treatment: a comparative study of bisoprolol and enalapril. <i>J Cardiovasc Pharmacol</i> .1992; 20: 750                                                                                                                   |   | X |
| 46. Bremner et al. Early side-effects of antihypertensive therapy: comparison of amlodipine and nifedipine retard. <i>J Hum Hypertens</i> .1993; 7: 79                                                                                                                                         |   | X |
| 47. Bremner et al. Valsartan: long-term efficacy and tolerability compared to lisinopril in elderly patients with essential hypertension. <i>Clin Exp Hypertens</i> .1997; 19: 1263                                                                                                            |   | X |
| 48. Bulpitt et al. Results of the pilot study for the Hypertension in the Very Elderly Trial <i>J Hypertens</i> 2003; 21: 2409                                                                                                                                                                 | X |   |
| 49. Byyny et al. Losartan potassium lowers blood pressure measured by ambulatory blood pressure monitoring. <i>J Hypertens</i> 1995; 13: s29                                                                                                                                                   | X | X |
| 50. Campbell et al. Effects of combined ACE inhibitor and angiotensin II antagonist treatment in human chronic nephropathies. <i>Kidney Int</i> 2003; 63: 1094                                                                                                                                 | X | X |
| 51. Campese et al. Omapatrilat versus lisinopril: efficacy and neurohormonal profile in salt-sensitive hypertensive patients. <i>Hypertension</i> 2001; 38: 1342                                                                                                                               | X |   |
| 52. Capek et al. Effects of captopril treatment versus placebo on renal function in type 2 diabetic patients with microalbuminuria: a long-term study. <i>Clin Invest</i> 1994; 72: 961                                                                                                        | X |   |
| 53. Capewell et al. A trial of the calcium antagonist felodipine in hypertensive type 2 diabetic patients. <i>Diabetic Med</i> 1989; 6: 809                                                                                                                                                    | X |   |
| 54. Carlsen et al. Relation between dose of bendrofluazide, antihypertensive effect, and adverse biochemical effects. <i>BMJ</i> .1990; 300: 975                                                                                                                                               |   | X |
| 55. Carr et al. Effectiveness of once-daily monotherapy with a new nifedipine sustained release calcium antagonist. <i>Am J Cardiol</i> .1992; 69: 28                                                                                                                                          |   | X |
| 56. Carr et al. Once-daily verapamil in the treatment of mild-to-moderate hypertension: a double-blind placebo-controlled                                                                                                                                                                      |   | X |

|                                                                                                                                                                                                                                                   |   |   |
|---------------------------------------------------------------------------------------------------------------------------------------------------------------------------------------------------------------------------------------------------|---|---|
| dose-ranging study <i>J Clin Pharmacol</i> .1991; 31: 144                                                                                                                                                                                         |   |   |
| 57. Carreta et al. Pulse pressure responses in patients treated with Valsartan and hydrochlorothiazide combination therapy. <i>J Int Med Res</i> 2003; 31.5: 370                                                                                  | X |   |
| 58. Carruthers et al. Comparative trial of doxazosin and atenolol on cardiovascular risk reduction in systemic hypertension. The Alpha Beta Canada Trial Group <i>Am J Cardiol</i> 1993; 71: 575                                                  | X |   |
| 59. Catalano et al. Effects of treatment with verapamil SR and captopril on the lipid profile of hypertensive patients. <i>Drugs</i> 1992; 44: 88                                                                                                 | X |   |
| 60. Celentano et al. Effects on casual and 24-h ambulatory blood pressure of slow-release nifedipine and chlorthalidone in arterial essential hypertension: double-blind, crossover study. <i>Int J Clin Pharmacol Ther Toxicol</i> 1990; 28: 190 | X | X |
| 61. Celik et al. Comparative effects of nebivolol and metoprolol on oxidative stress, insulin resistance, plasma adiponectin and soluble P-selectin levels in hypertensive patients <i>J Hum Hypertens</i> 2006; 24: 591                          | X |   |
| 62. Celis et al. Does isradipine modified release 5 mg once daily reduce blood pressure for 24 hours? <i>J Cardiovasc Pharmacol</i> 1993; 22: 300                                                                                                 | X |   |
| 63. Chalmers et al. Long-term efficacy of a new, fixed, very-low-dose angiotensin-converting enzyme-inhibitor/diuretic combination as first-line therapy in elderly hypertensive patients. <i>J Hypertens</i> 2000; 18: 327                       | X |   |
| 64. Chan et al. Additive effects of diltiazem and lisinopril in the treatment of elderly patients with mild-to-moderate hypertension. <i>Am J Hypertens</i> 1997; 10: 743                                                                         | X | X |
| 65. Chan et al. Double-blind comparison of losartan, lisinopril, and metolazone in elderly hypertensive patients with previous angiotensin-converting enzyme inhibitor-induced cough. <i>J Clin Pharmacol</i> 1997; 37.3: 253                     | X | X |
| 66. Chan et al. Long-term effects of angiotensin-converting enzyme inhibition and metabolic control in hypertensive type 2 diabetic patients. <i>Kidney Int</i> 2000; 57: 590                                                                     | X |   |
| 67. Chanudet et al. Antihypertensive efficacy and tolerability of low-dose perindopril/indapamide combination compared with losartan in the treatment of essential hypertension <i>Int J Clin Pract</i> 2001; 55.4: 233                           | X |   |
| 68. Chellingsworth et al. The effects of verapamil, diltiazem, nifedipine and propranolol on metabolic control in hypertensives with non-insulin dependent diabetes mellitus. <i>J Hum Hypertens</i> 1989; 3: 35                                  | X | X |
| 69. Cheung et al. Fosinopril reduces left ventricular mass in untreated hypertensive patients: a controlled trial. <i>Br J Clin Pharmacol</i> 1999; 47: 179                                                                                       | X |   |
| 70. Chiou et al. Randomized, double-blind comparison of irbesartan and enalapril for treatment of mild to moderate hypertension. <i>Zhonghua Yi Xue Za Zhi (Taipei)</i> 2000; 63.5368                                                             | X | X |
| 71. Christensen et al. A randomized comparison of isradipine slow release given once daily with isradipine twice daily on 24 hour blood pressure in hypertensive patients. <i>J Hum Hypertens</i> 1991; 5: 121                                    | X |   |
| 72. Christensen et al. Autoregulated glomerular filtration rate during candesartan treatment in hypertensive type 2 diabetic patients. <i>Kidney int</i> 2001; 60: 1435                                                                           | X |   |
| 73. Chrysant et al. Antihypertensive effectiveness of low-dose lisinopril-hydrochlorothiazide combination. A large multicenter study. Lisinopril-Hydrochlorothiazide Group. <i>Arch Intern Med</i> .1994; 154: 737                                |   | X |
| 74. Chrysant et al. Perindopril as monotherapy in hypertension: a multicenter comparison of two dosing regimens. The Perindopril Study Group. <i>Clin Pharmacol Ther</i> 1993; 53: 479                                                            | X | X |

|                                                                                                                                                                                                                                                                                                                                                  |  |   |   |
|--------------------------------------------------------------------------------------------------------------------------------------------------------------------------------------------------------------------------------------------------------------------------------------------------------------------------------------------------|--|---|---|
| 75. Chrysant et al. The combination of olmesartan medoxomil and amlodipine besylate in controlling high blood pressure: COACH, a randomized, double-blind, placebo-controlled, 8-week factorial efficacy and safety study. <i>Clin Ther.</i> 2008; 30: 587                                                                                       |  |   | X |
| 76. Chung et al. Comparison of the efficacy and safety of losartan (50-100 mg) with the T-type calcium channel blocker mibefradil (50-100 mg) in mild to moderate hypertension <i>Fundam Clin Pharmacol</i> 2000; 14.1: 31                                                                                                                       |  | X |   |
| 77. Chung et al. Comparison of the efficacy and safety of losartan (50-100 mg) with the T-type calcium channel blocker mibefradil (50-100 mg) in mild to moderate hypertension <i>Fundam Clin Pharmacol.</i> 2000; 14.1: 31                                                                                                                      |  |   | X |
| 78. Cilliers et al. Atenolol as primary therapy in previously untreated hypertensives and as an adjuvant to other therapy. A South African Multicentre Study. <i>S Afr Med J</i> 1979; 55: 321                                                                                                                                                   |  | X |   |
| 79. Clamp et al. Comparative trial of nifedipine retard and atenolol in the treatment of elderly patients with mild to moderate hypertension. <i>J Hum Hypertens</i> 1990; 4: 557                                                                                                                                                                |  | X | X |
| 80. Clement et al. Effect of beta-adrenergic blockade on blood pressure variation in patients with moderate hypertension. <i>Eur J Clin Pharmacol</i> 1977; 11: 325                                                                                                                                                                              |  | X |   |
| 81. Clement et al. Effect of calcium antagonists on ambulatory blood pressure and its variations. <i>J Cardiovasc Pharmacol</i> 1987; 10 s 10: 117                                                                                                                                                                                               |  | X |   |
| 82. Cleophas et al. Quality of life before and during antihypertensive treatment: a comparative study of celiprolol and atenolol <i>Am J Ther</i> 1997; 4.4: 117                                                                                                                                                                                 |  | X |   |
| 83. Coca et al. A multicenter, parallel comparative study of the antihypertensive efficacy of once-daily lisinopril vs enalapril with 24-h ambulatory blood pressure monitoring in essential hypertension. <i>J Hum Hypertens</i> 1996; 10: 837                                                                                                  |  | X | X |
| 84. Coca et al. A multicenter, randomized, double-blind comparison of the efficacy and safety of irbesartan and enalapril in adults with mild to moderate essential hypertension, as assessed by ambulatory blood pressure monitoring: the MAPAVEL Study (Monitorización Ambulatoria Presión Arterial APROVEL). <i>Clin Ther</i> 2002; 24.1: 126 |  | X |   |
| 85. Conlin et al. A study of losartan, alone or with hydrochlorothiazide vs nifedipine GITS in elderly patients with diastolic hypertension <i>J Hum Hypertens</i> 1998; 12.1: 693                                                                                                                                                               |  | X |   |
| 86. Conway et al. Is the antihypertensive effect of captopril influenced by the dosage frequency? A study with ambulatory monitoring. <i>J Hum Hypertens</i> 1988; 2: 123                                                                                                                                                                        |  | X |   |
| 87. Corea et al. Valsartan, a new angiotensin II antagonist for the treatment of essential hypertension: a comparative study of the efficacy and safety against amlodipine <i>Clin Pharmacol Ther</i> 1996; 60.3: 341                                                                                                                            |  | X | X |
| 88. Cosenzi et al. Doxazosin versus nitrendipine: a double-blind comparative study in patients adhering to a sodium-restricted diet. <i>Cardiovasc Drug Ther</i> 1994; 8: 473                                                                                                                                                                    |  | X |   |
| 89. Cranston et al. The effects of spironolactone and chlorthalidone on arterial pressure. <i>Lancet</i> 1962; 1: 1161                                                                                                                                                                                                                           |  | X |   |
| 90. Crepaldi et al. Hypertension and non-insulin-dependent diabetes. A comparison between an angiotensin-converting enzyme inhibitor and a calcium antagonist. <i>Acta Diabetologica</i> 1995; 32.3: 203                                                                                                                                         |  | X |   |
| 91. Cruickshank et al. Treating hypertension in black compared with white non-insulin dependent diabetics: a double blind trial of verapamil and metoprolol. <i>BMJ</i> 1988; 297: 1155                                                                                                                                                          |  | X |   |
| 92. Cubeddu et al. A comparison of verapamil and propranolol for the initial treatment of hypertension. Racial differences in response. <i>JAMA</i> 1986; 256: 2214                                                                                                                                                                              |  | X | X |
| 93. Cushman et al. Comparison of the fixed combination of enalapril/diltiazem ER and their monotherapies in stage 1 to 3                                                                                                                                                                                                                         |  |   | X |

|                                                                                                                                                                                                                                                                                                                                                                 |        |   |   |
|-----------------------------------------------------------------------------------------------------------------------------------------------------------------------------------------------------------------------------------------------------------------------------------------------------------------------------------------------------------------|--------|---|---|
| essential hypertension. <i>Am J Hypertens</i> .1998; 11: 23                                                                                                                                                                                                                                                                                                     |        |   |   |
| 94. Cushman et al. The effect of a losartan-based treatment regimen on isolated systolic hypertension. <i>J Clin Hyp</i> .2002; 4.2: 101                                                                                                                                                                                                                        |        |   | X |
| 95. Dahlof et al. Cardiovascular morbidity and mortality in the Losartan Intervention For Endpoint reduction in hypertension study (LIFE): a randomised trial against atenolol. <i>Lancet</i> 2002; 359: 995                                                                                                                                                    | LIFE   | X | X |
| 96. Dahlof et al. Effects of diltiazem and metoprolol on blood pressure, adverse symptoms and general well-being. The Swedish Diltiazem-Metoprolol Multi-Centre Study Group. <i>Eur J Clin Pharmacol</i> 1991; 40: 453                                                                                                                                          |        | X |   |
| 97. Dahlof et al. Efficacy and tolerability of losartan potassium and atenolol in patients with mild to moderate essential hypertension <i>Am J Hypertens</i> 1995; 8.6: 578                                                                                                                                                                                    |        | X |   |
| 98. Dahlof et al. Main results of the losartan versus amlodipine (LOA) study on drug tolerability and psychological general well-being. LOA Study Group <i>J Hypertens</i> 1997; 51.11: 1327                                                                                                                                                                    |        | X |   |
| 99. Dahlof et al. Morbidity and mortality in the Swedish Trial in Old Patients with Hypertension (STOP-Hypertension) <i>Lancet</i> 1991; 338: 1281                                                                                                                                                                                                              | STOP I | X |   |
| 100. Dahlof et al. Prevention of cardiovascular events with an antihypertensive regimen of amlodipine adding perindopril as required versus atenolol adding bendroflumethiazide as required, in the Anglo-Scandinavian Cardiac Outcomes Trial-Blood Pressure Lowering Arm (ASCOT-BPLA): a multicentre randomised controlled trial. <i>Lancet</i> 2005; 366: 895 | ASCOT  | X |   |
| 101. Daniels et al. Atenolol plus nifedipine for mild to moderate systemic hypertension after fixed doses of either agent alone. <i>Am J Cardiol</i> .1986; 57: 965                                                                                                                                                                                             |        |   | X |
| 102. Dargie et al. Combination of verapamil and beta blockers in systemic hypertension. <i>Am J Cardiol</i> 1986; 57: 80                                                                                                                                                                                                                                        |        | X |   |
| 103. Davidov et al. Bisoprolol, a once-a-day beta-blocking agent for patients with mild to moderate hypertension. <i>Clin Cardiol</i> .1994; 17: 263                                                                                                                                                                                                            |        |   | X |
| 104. de Bruijn et al. Multicenter placebo-controlled comparison of amlodipine and atenolol in mild to moderate hypertension. <i>J Cardiovasc Pharmacol</i> .1988; 12: 107                                                                                                                                                                                       |        |   | X |
| 105. De Cesaris et al. A single-blind comparison of the efficacy and tolerability of lisinopril and quinapril in the treatment of essential hypertension. <i>Acta Therapeutica</i> 1991; 17: 69                                                                                                                                                                 |        | X |   |
| 106. De Cesaris et al. Effects of atenolol and enalapril on kidney function in hypertensive diabetic patients. <i>J Cardiovasc Pharmacol</i> 1993; 22: 208                                                                                                                                                                                                      |        | X |   |
| 107. de Simone et al. Effects of nifedipine on left ventricular hemodynamic patterns in systemic hypertension. <i>Am J Hypertens</i> 1989; 2: 139                                                                                                                                                                                                               |        | X |   |
| 108. de Simone et al. Effects of slow-release nifedipine on left ventricular mass and systolic function in mild or moderate hypertension <i>Curr Ther Res</i> 1984; 36: 537                                                                                                                                                                                     |        | X |   |
| 109. De Simone et al. Slow-release nifedipine versus placebo in the treatment of arterial hypertension. A double blind ergometric evaluation of cardiac workload. <i>Jpn Heart J</i> 1985; 26: 219                                                                                                                                                              |        | X |   |
| 110. Deary et al. The effects of captopril vs atenolol on memory, information processing and mood: a double-blind crossover study. <i>Br J Clin Pharmacol</i> 1991; 32: 347                                                                                                                                                                                     |        | X |   |
| 111. Del Vecchio et al. Efficacy and tolerability of manidipine in the treatment of hypertension in patients with non-diabetic chronic kidney disease without glomerular disease. Prospective, randomized, double-blind study of parallel groups in comparison with enalapril. <i>J Nephrol</i> 2004; 17: 261                                                   |        | X |   |

|                                                                                                                                                                                                                                                                          |   |   |
|--------------------------------------------------------------------------------------------------------------------------------------------------------------------------------------------------------------------------------------------------------------------------|---|---|
| 112. Delles et al. Direct comparison of the effects of valsartan and amlodipine on renal hemodynamics in human essential hypertension <i>Am J Hypertens</i> 2003; 16.12: 1030                                                                                            | X |   |
| 113. Denolle et al. Effects of nicardipine and clonidine on cognitive functions and electroencephalography in hypertensive patients. <i>Fundam Clin Pharmacol</i> 2002; 16: 527                                                                                          | X |   |
| 114. Dey et al. Comparison of nifedipine GITS and hydrochlorothiazide in the management of elderly patients with stage I-III diastolic hypertension <i>Am J Hypertens</i> 1996; 9.6: 598                                                                                 | X |   |
| 115. Dimenas et al. Comparison of CNS-related subjective symptoms in hypertensive patients treated with either a new controlled release (CR/ZOK) formulation of metoprolol or atenolol. <i>J Clin Pharmacol</i> 1990; 30: 82                                             | X |   |
| 116. Distler et al. Clinical aspects of antihypertensive therapy with urapidil. Comparison with hydrochlorothiazide. <i>Drugs</i> 1990; 40: 21                                                                                                                           | X |   |
| 117. Dittrich et al. Effects of sustained-release nicardipine on regression of left ventricular hypertrophy in systemic hypertension. <i>Am J Cardiol</i> 1992; 69: 1559                                                                                                 | X |   |
| 118. Duchier et al. Antihypertensive effect of sustained-release isosorbide dinitrate for isolated systolic systemic hypertension in the elderly. <i>Am J Cardiol</i> 1987; 60: 99                                                                                       | X |   |
| 119. Duncan et al. Effect of intrinsic sympathomimetic activity on the ability of hypertensive patients to derive a cardiorespiratory training effect during chronic beta-blockade. <i>Am J Hypertens</i> 1990; 3: 302                                                   | X |   |
| 120. Durel et al. Effectiveness of antihypertensive medications in office and ambulatory settings: a placebo-controlled comparison of atenolol, metoprolol, chlorthalidone, verapamil, and an atenolol-chlorthalidone combination. <i>J Clin Pharmacol</i> 1992; 32: 564 | X |   |
| 121. Enstrom et al. Comparison between enalapril and lisinopril in mild-moderate hypertension: a comprehensive model for evaluation of drug efficacy. <i>Blood Press</i> 1992; 1: 102                                                                                    | X |   |
| 122. Erqteman et al. Beta blockade, diuretics, and salt restriction for the management of mild hypertension: a randomised double blind trial. <i>BMJ</i> 1984; 289: 406                                                                                                  | X | X |
| 123. Fadayomi et al. Monotherapy with nifedipine for essential hypertension in adult blacks. <i>J Cardiovasc Pharmacol</i> 1986; 8: 466                                                                                                                                  | X |   |
| 124. Fagan et al. Blood pressure reduction and tolerability of felodipine ER in older and younger hypertensive patients. The Felodipine ER in the Elderly versus Young Working Group. <i>J Am Geriatr Soc.</i> 1997; 45: 712                                             |   | X |
| 125. Fariello et al. Antihypertensive efficacy of urapidil versus hydrochlorothiazide alone in patients with mild to moderate essential hypertension and of their combination in nonresponders to monotherapy. <i>Drugs</i> 1990; 40 s 4: 60                             | X |   |
| 126. Farsang et al. The efficacy and tolerability of losartan versus atenolol in patients with isolated systolic hypertension. Losartan ISH Investigators Group. <i>J Hypertens</i> 2000; 18: 795                                                                        | X | X |
| 127. Faust et al. The tolerability of nilvadipine compared to nifedipine in patients with essential hypertension. <i>J Cardiovasc Pharmacol</i> 1992; 20: 56                                                                                                             | X |   |
| 128. Feher et al. Alpha-blocker therapy; a possible advance in the treatment of diabetic hypertension--results of a cross-over study of doxazosin and atenolol monotherapy in hypertensive non-insulin dependent diabetic subjects. <i>J Hun Hypertens.</i> 1990; 4: 571 |   | X |
| 129. Feig et al. The efficacy and safety of once-daily nifedipine coat-core in the treatment of mild-to-moderate hypertension. Adalat CC Cooperative Study Group. <i>Clin Ther.</i> 1993; 15: 963                                                                        |   | X |

|                                                                                                                                                                                                                                                           |  |   |   |
|-----------------------------------------------------------------------------------------------------------------------------------------------------------------------------------------------------------------------------------------------------------|--|---|---|
| 130. Feit et al. The effects of labetalol and prazosin on exercise haemodynamics in hypertensive patients. <i>J Hum Hypertens</i> .1991; 5: 39                                                                                                            |  |   | X |
| 131. Fernandez et al. Combined versus single effect of fosinopril and hydrochlorothiazide in hypertensive patients. <i>Hypertension</i> .1994; 23 s I: 207                                                                                                |  |   | X |
| 132. Fernandez et al. The 24 h blood pressure responses of hypertensives to a once-a-day cilazapril regimen. <i>Can j Cardiol</i> 1990; 6: 53                                                                                                             |  | X | X |
| 133. Fernandez-Andrade et al. Comparison of losartan and amlodipine in renally impaired hypertensive patients. <i>Kidney Int Suppl</i> 1998; 68: S120                                                                                                     |  |   | X |
| 134. Ferrara et al. Antihypertensive and cardiovascular effects of nitrendipine: a controlled study vs. placebo. <i>Clin Pharmacol Ther</i> 1985; 38: 434                                                                                                 |  |   | X |
| 135. Ferrara et al. Changes in left ventricular mass during a double-blind study with chlorthalidone and slow-release nifedipine. <i>Eur J Clin Pharmacol</i> 1984; 27: 525                                                                               |  |   | X |
| 136. Fiddes et al. Evaluation of indapamide 1.25 mg once daily in elderly patients with mild to moderate hypertension. <i>J Hum Hypertens</i> .1997; 11: 239                                                                                              |  |   | X |
| 137. Flack et al. Antihypertensive efficacy and safety of losartan alone and in combination with hydrochlorothiazide in adult African Americans with mild to moderate hypertension. <i>Clin Ther</i> .2001; 23: 1193                                      |  |   | X |
| 138. Flack et al. Efficacy and tolerability of eplerenone and losartan in hypertensive black and white patients. <i>J Am Coll Cardiol</i> .2003; 41: 1148                                                                                                 |  |   | X |
| 139. Flack et al. Regression of microalbuminuria: results of a controlled study, indapamide versus captopril. <i>J Cardiovasc Pharmacol</i> 1993; 22s6: 75                                                                                                |  |   | X |
| 140. Fletcher et al. Quality of life on antihypertensive therapy: a randomized double-blind controlled trial of captopril and atenolol. <i>J Hypertens</i> 1990; 8: 463                                                                                   |  |   | X |
| 141. Fodor et al. Comparative efficacy and tolerability of nisoldipine coat core and hydrochlorothiazide in mild-to-moderate hypertension. <i>Int J Clin Pract</i> .1997; 51: 271                                                                         |  |   | X |
| 142. Fodor et al. Efficacy of once daily nitrendipine in mild hypertension: comparison with placebo. <i>Can j Cardiol</i> .1991; 7: 223                                                                                                                   |  |   | X |
| 143. Fogari et al. 24-hour blood pressure control by once-daily administration of irbesartan assessed by ambulatory blood pressure monitoring. Irbesartan Multicenter Investigators' Group. <i>J Hypertens</i> .1997; 15: 1511                            |  |   | X |
| 144. Fogari et al. Angiotensin II receptor antagonist telmisartan in isolated systolic hypertension (ARAMIS) study: efficacy and safety of telmisartan 20, 40 or 80 mg versus hydrochlorothiazide 12.5 mg or placebo. <i>Curr Ther Res</i> 2001; 62.1: 68 |  | X | X |
| 145. Fogari et al. Combined therapy with benazepril and amlodipine in the treatment of hypertension inadequately controlled by an ACE inhibitor alone. <i>J Cardiovasc Pharmacol</i> 1997; 30: 497                                                        |  |   | X |
| 146. Fogari et al. Comparative Efficacy of Losartan and Valsartan in Mild-to-Moderate Hypertension: Results of 24-Hour Ambulatory Blood Pressure Monitoring <i>Curr Ther Res</i> 1999; 60: 195                                                            |  |   | X |
| 147. Fogari et al. Comparison of the effects of valsartan and felodipine on plasma leptin and insulin sensitivity in hypertensive obese patients. <i>Hypertension Res</i> 2005; 28: 209                                                                   |  |   | X |
| 148. Fogari et al. Effect of antihypertensive treatment with valsartan or atenolol on sexual activity and plasma testosterone in hypertensive men <i>Eur J Clin Pharmacol</i> 2002; 58.3: 177                                                             |  |   | X |

|                                                                                                                                                                                                                                                                   |   |   |
|-------------------------------------------------------------------------------------------------------------------------------------------------------------------------------------------------------------------------------------------------------------------|---|---|
| 149. Fogari et al. Effect of benazepril addition to amlodipine on ankle oedema and subcutaneous tissue pressure in hypertensive patients. <i>J Hum Hypertens</i> 2003; 17: 207                                                                                    | X |   |
| 150. Fogari et al. Effect of low-dose manidipine on ambulatory blood pressure in very elderly hypertensives. <i>Cardiovasc Drug Ther</i> 1999; 13: 243                                                                                                            | X |   |
| 151. Fogari et al. Effects of amlodipine fosinopril combination on microalbuminuria in hypertensive type 2 diabetic patients. <i>Am J Hypertens</i> 2002; 15: 1042                                                                                                | X |   |
| 152. Fogari et al. Effects of lisinopril vs hydralazine on left ventricular hypertrophy and ambulatory blood pressure monitoring in essential hypertension. <i>Eur Heart J</i> 1995; 16: 1120                                                                     | X |   |
| 153. Fogari et al. Effects of valsartan compared with enalapril on blood pressure and cognitive function in elderly patients with essential hypertension. <i>Eur J Clin Pharmacol</i> 2004; 59: 863                                                               | X |   |
| 154. Fogari et al. Fixed combination of benazepril and low-dose amlodipine in the treatment of mild to moderate essential hypertension: evaluation by 24-hour noninvasive ambulatory blood pressure monitoring. <i>J Cardiovasc Pharmacol</i> 1997; 30: 176       | X |   |
| 155. Fogari et al. Long-term effects of ramipril and nitrendipine on albuminuria in hypertensive patients with type II diabetes and impaired renal function. <i>J Hum Hypertens</i> 1999; 13: 47                                                                  | X |   |
| 156. Forette et al. Rationale for ACE inhibition in the elderly: treatment of arterial hypertension with enalapril. <i>Gerontology</i> 1987; 33: 9                                                                                                                | X |   |
| 157. Forslund et al. Comparison of fosinopril and hydrochlorothiazide in patients with mild to moderate hypertension. <i>J intern Med</i> 1991; 230: 511                                                                                                          | X |   |
| 158. Franz et al. Long-term effect of antihypertensive therapy on left ventricular hypertrophy. <i>J Hypertens</i> 1987; 5s5: s415                                                                                                                                | X |   |
| 159. Frei et al. Moxonidine and hydrochlorothiazide in combination: a synergistic antihypertensive effect <i>J Cardiovasc Pharmacol</i> 1994; 24 s 1: S25                                                                                                         | X |   |
| 160. Frimhodt-Moeller et al. Quality of life, side effects and efficacy of lisinopril compared with metoprolol in patients with mild to moderate essential hypertension. <i>J Hum Hypertens</i> 1991; 5: 215                                                      | X | X |
| 161. Frishman et al. Amlodipine versus atenolol in essential hypertension. <i>Am J Cardiol</i> .1994; 73: 50                                                                                                                                                      |   | X |
| 162. Frishman et al. Comparison of hydrochlorothiazide and sustained-release diltiazem for mild-to-moderate systemic hypertension. <i>Am J Cardiol</i> 1987; 59: 615                                                                                              | X | X |
| 163. Frishman et al. First-line therapy option with low-dose bisoprolol fumarate and low-dose hydrochlorothiazide in patients with stage I and stage II systemic hypertension. <i>J Clin Pharmacol</i> .1995; 35: 182                                             |   | X |
| 164. Frishman et al. Multicenter comparison of the nifedipine gastrointestinal therapeutic system and long-acting propranolol in patients with mild to moderate systemic hypertension receiving diuretics. A preliminary experience. <i>Am J Med</i> 1987; 83: 15 | X | X |
| 165. Fritschka et al. Comparisons of once-daily nilvadipine with enalapril and diuretic in patients with essential hypertension. <i>J Cardiovasc Pharmacol</i> 1992; 20 s 6: 62                                                                                   | X |   |
| 166. Fukiyama et al. A double-blind comparative study of doxazosin and prazosin in the treatment of essential hypertension. <i>Am Heart J</i> 1991; 121: 317                                                                                                      | X |   |
| 167. Gambini et al. Acute and short-term effects of nitrendipine and diltiazem at rest and during exercise in hypertensive patients. <i>Clin Ther</i> 1991; 13: 680                                                                                               | X |   |



|                                                                                                                                                                                                                                        |   |   |
|----------------------------------------------------------------------------------------------------------------------------------------------------------------------------------------------------------------------------------------|---|---|
| 168. Gans et al. Effect of cilazapril on glucose tolerance and lipid profile in hypertensive patients with non-insulin-dependent diabetes mellitus. <i>Neth J Med</i> 1993; 43: 3                                                      | X |   |
| 169. Garca et al. Hydrochlorothiazide versus spironolactone: long-term metabolic modifications in patients with essential hypertension <i>J Clin Pharmacol</i> 1991; 31: 455                                                           | X |   |
| 170. Gavras et al. Antihypertensive effectiveness of the nifedipine gastrointestinal therapeutic system. <i>Am J med</i> 1987; 83 6: 20                                                                                                | X |   |
| 171. Genovesi-ebert et al. Effect of a new multifactorial antihypertensive on heart morphology and function in mild to moderate essential arterial hypertension. <i>Eur Heart J</i> 1992; 13A: 45                                      | X |   |
| 172. Gerdts et al. Factors influencing reduction in blood pressure and left ventricular mass in hypertensive type-1 diabetic patients using captopril or doxazosin for 6 months. <i>Am J Hypertens</i> 1998; 11: 1178                  | X |   |
| 173. Giles et al. Comparison of nitrendipine and hydrochlorothiazide for systemic hypertension. <i>Am J Cardiol</i> 1987; 60: 103                                                                                                      | X |   |
| 174. GLANT et al. A 12-month comparison of ACE inhibitor and CA antagonist therapy in mild to moderate essential hypertension--The GLANT Study. Study Group on Long-term Antihypertensive Therapy. <i>Hypertens Res</i> 1995; 18: 235  | X |   |
| 175. Glasser et al. Regression of left ventricular hypertrophy in treated hypertensive patients with dilevalol and metoprolol--a double blind randomized study <i>J Clin Pharmacol</i> 1989; 29: 791                                   | X |   |
| 176. Gleerup et al. Does calcium channel blockade and beta-adrenergic blockade affect platelet function and fibrinolysis to a varying degree? <i>J Cardiovasc Pharmacol</i> 1995; 25: 87                                               | X |   |
| 177. Gonzalez-Juanatey et al. [Effect of verapamil and nitrendipine on the left ventricular mass and function (systolic and diastolic) in arterial hypertension] <i>Rev Esp Cardiol</i> 1994; 47: 375                                  | X |   |
| 178. Gosse et al. [Effects of verapamil and nifedipine on blood pressure during rest and exertion and on left ventricular hypertrophy] <i>Arch Mal Coeur (French)</i> 1992; 85: 1249                                                   | X |   |
| 179. Gosse et al. Beta-blockers vs. angiotensin-converting enzyme inhibitors in hypertension: effects on left ventricular hypertrophy <i>J Cardiovasc Pharmacol</i> 1990; 16 S 5: S145                                                 | X |   |
| 180. Gosse et al. Regression of left ventricular hypertrophy in hypertensive patients treated with indapamide SR 1.5 mg versus enalapril 20 mg: the LIVE study. <i>J Hypertens</i> 2000; 18: 1465                                      | X |   |
| 181. Gould et al. Slow channel inhibitors verapamil and nifedipine in the management of hypertension <i>J Cardiovasc Pharmacol</i> 1982; 4: s369                                                                                       | X |   |
| 182. Gradman et al. A randomized, placebo-controlled, double-blind, parallel study of various doses of losartan potassium compared with enalapril maleate in patients with essential hypertension. <i>Hypertension</i> .1995; 25: 1345 |   | X |
| 183. Gradman et al. Aliskiren, a novel orally effective renin inhibitor, provides dose-dependent antihypertensive efficacy and placebo-like tolerability in hypertensive patients. <i>Circulation</i> 2005; 111: 1012                  | X | X |
| 184. Gradman et al. Assessment of once-daily eprosartan, an angiotensin II antagonist, in patients with systemic hypertension. Eprosartan Study Group. <i>Clin Ther</i> .1999; 21: 442                                                 |   | X |
| 185. Grandi et al. Ambulatory blood pressure and left ventricular changes during antihypertensive treatment: perindopril versus isradipine. <i>J Cardiovasc Pharmacol</i> 1995; 26: 737                                                | X |   |
| 186. Grandi et al. Double-blind comparison of perindopril and captopril in hypertension. Effects on left ventricular morphology and function. <i>Am J Hypertens</i> 1991; 4: 516                                                       | X |   |
| 187. Grassi et al. Efficacy and tolerability profile of nebivolol vs atenolol in mild-to-moderate essential hypertension: results of a                                                                                                 | X |   |

|                                                                                                                                                                                                                                                     |        |   |
|-----------------------------------------------------------------------------------------------------------------------------------------------------------------------------------------------------------------------------------------------------|--------|---|
| double-blind randomized multicentre trial <i>Blood Press</i> 2003; S2: 35                                                                                                                                                                           |        |   |
| 188. Grimm et al. Amlodipine versus chlorthalidone versus placebo in the treatment of stage I isolated systolic hypertension. <i>Am J Hypertens</i> 2002; 15 1 pt 1: 31                                                                             | X      |   |
| 189. Gudbjornsdottir et al. The effect of metoprolol treatment on insulin sensitivity and diurnal plasma hormone levels in hypertensive subjects. <i>Eur J Clin Invest</i> 1997; 27: 29                                                             | X      |   |
| 190. Guitard et al. Comparison of efficacy of spirapril and enalapril in control of mild-to-moderate hypertension. <i>Cardiovasc Drug Ther.</i> 1997; 11: 449                                                                                       |        | X |
| 191. Guitard et al. Placebo-controlled crossover comparison of spirapril at 3, 6, 12 and 24 mg once daily in mild to severe essential hypertension. <i>Blood Press.</i> 1994; 3 s 2: 61                                                             |        | X |
| 192. Habte et al. The efficacy of hydrochlorothiazide, timolol and enalapril in Ethiopians with essential hypertension. <i>Ethiop Med J</i> 1992; 30: 163                                                                                           | X      |   |
| 193. Hakamaki et al. Metabolic effects of spirapril and atenolol: results from a randomized, long-term study <i>Int J Clin Pharmacol Ther</i> 1997; 35.6: 227                                                                                       | X      |   |
| 194. Hall et al. Lower dose diuretic therapy in the treatment of patients with mild to moderate hypertension. <i>J Hum Hypertens.</i> 1994; 8: 571                                                                                                  |        | X |
| 195. Hannedouche et al. Randomised controlled trial of enalapril and beta blockers in non-diabetic chronic renal failure. <i>BMJ</i> 1994; 309: 833                                                                                                 | X      |   |
| 196. Hansson et al. Randomised trial of effects of calcium antagonists compared with diuretics and beta-blockers on cardiovascular morbidity and mortality in hypertension: the Nordic Diltiazem (NORDIL) study. <i>Lancet</i> 2000; 356: 359       | NORDIL | X |
| 197. Hansson et al. Randomised trial of old and new antihypertensive drugs in elderly patients: cardiovascular mortality and morbidity the Swedish Trial in Old Patients with Hypertension-2 Study. <i>Lancet.</i> 1999; 354: 1751                  |        | X |
| 198. Hansson et al. Results of the STOP-Hypertension-2 trial. <i>Blood Press.</i> 2000; 2: 17                                                                                                                                                       |        | X |
| 199. Harper et al. Effects of low dose versus conventional dose thiazide diuretic on insulin action in essential hypertension. <i>BMJ</i> 1994; 309: 226                                                                                            | X      |   |
| 200. Hart et al. ACE inhibition versus calcium antagonism in the treatment of mild to moderate hypertension: a multicentre study. Ireland-Netherlands Lisinopril-Nifedipine Study Group. <i>Postgrad Med J</i> 1993; 69: 450                        | X      | X |
| 201. Hauf-Zachariou et al. A double-blind comparison of the effects of carvedilol and captopril on serum lipid concentrations in patients with mild to moderate essential hypertension and dyslipidaemia. <i>Eur J Clin Pharmacol.</i> 1993; 45: 95 |        | X |
| 202. Havinga et al. Captopril compared to atenolol in mild to moderate hypertension in a randomized double-blind controlled trial. <i>Neth J Med</i> 1991; 38: 13                                                                                   | X      |   |
| 203. Hedner et al. A comparison of the angiotensin II antagonists valsartan and losartan in the treatment of essential hypertension. <i>Am J Hypertens.</i> 1999; 12: 414                                                                           |        | X |
| 204. Hedner et al. The efficacy and tolerance of one or two daily doses of eprosartan in essential hypertension. The Eprosartan Multinational Study Group. <i>J Hypertens.</i> 1999; 17: 129                                                        |        | X |
| 205. Hegner et al. Valsartan, a new angiotensin II antagonist for the treatment of essential hypertension: efficacy and safety compared to hydrochlorothiazide. <i>Eur J Clin Pharmacol</i> 1997; 52.3: 173                                         | X      | X |
| 206. Henderson et al. Structural adaptation of the heart in borderline hypertensives in response to blood pressure lowering with                                                                                                                    | X      |   |

|                                                                                                                                                                                                                                                                                                        |   |   |
|--------------------------------------------------------------------------------------------------------------------------------------------------------------------------------------------------------------------------------------------------------------------------------------------------------|---|---|
| captopril. <i>J Hypertens</i> 1994; 12: 65                                                                                                                                                                                                                                                             |   |   |
| 207. Himmelmann et al. Haemodynamic effects and pharmacokinetics of oral d- and l-nebivolol in hypertensive patients. <i>Eur J Clin Pharmacol</i> 1996; 51: 259                                                                                                                                        | X |   |
| 208. Holtzman et al. Multicenter comparison of once- and twice-daily isradipine to hydrochlorothiazide for the treatment of hypertension in elderly patients. <i>Clin Pharmacol Ther.</i> 1990; 48: 590                                                                                                |   | X |
| 209. Holwerda et al. Valsartan, a new angiotensin II antagonist for the treatment of essential hypertension: efficacy and safety compared with placebo and enalapril <i>J Hypertens</i> 1996; 14.9: 1147                                                                                               | X |   |
| 210. Holzgreve et al. Antihypertensive therapy with verapamil SR plus trandolapril versus atenolol plus chlorthalidone on glycemic control. <i>Am J Hypertens</i> 2003; 16: 381                                                                                                                        | X |   |
| 211. Hoogbrugge et al. Doxazosin and hydrochlorothiazide equally affect arterial wall thickness in hypertensive males with hypercholesterolaemia (the DAPHNE study). Doxazosin Atherosclerosis Progression Study in Hypertensives in the Netherlands. <i>Neth J Med</i> 2002; 60: 354                  | X |   |
| 212. Hosie et al. Felodipine once daily in elderly hypertensives. Binational MC Study Group (United Kingdom and Netherlands). <i>J Hum Hypertens</i> 1991; 5: 49                                                                                                                                       | X | X |
| 213. Hosomi et al. Angiotensin-converting enzyme inhibition with enalapril slows progressive intima-media thickening of the common carotid artery in patients with non-insulin-dependent diabetes mellitus. <i>Stroke</i> 2001; 32: 1539                                                               | X |   |
| 214. Houston et al. The effects of clonidine hydrochloride versus atenolol monotherapy on serum lipids, lipid subfractions, and apolipoproteins in mild hypertension. <i>Am Heart J</i> 1990; 120: 172                                                                                                 | X |   |
| 215. Hung et al. Comparison of antihypertensive efficacy and tolerability of losartan and extended-release felodipine in patients with mild to moderate hypertension <i>J Formos Med Assoc</i> 1999; 98.6: 403                                                                                         | X | X |
| 216. Iino et al. Renoprotective effect of losartan in comparison to amlodipine in patients with chronic kidney disease and hypertension--a report of the Japanese Losartan Therapy Intended for the Global Renal Protection in Hypertensive Patients (JLIGHT) study. <i>Hypertens Res</i> 2004; 27: 21 | X |   |
| 217. Ikeda et al. Comparative antihypertensive effects of losartan 50 mg and losartan 50 mg titrated to 100 mg in patients with essential hypertension. <i>Blood Press.</i> 1997; 6: 35                                                                                                                |   | X |
| 218. Inouye et al. Monotherapy in mild to moderate hypertension: comparison of hydrochlorothiazide, propranolol and prazosin. <i>Am J Cardiol</i> 1984; 53: 24A                                                                                                                                        | X |   |
| 219. Isles et al. A randomised double-blind study comparing nifedipine GITS 20 mg and bendrofluazide 2.5 mg administered once daily in mild-to-moderate hypertension. <i>J Hum Hypertens</i> 1999; 13: 69                                                                                              | X | X |
| 220. Italian et al. Multicenter evaluation of the safety and efficacy of isradipine in hypertension. The Italian-Belgian Isradipine Study Group. <i>Am j med.</i> 1989; 86 4 a: 94                                                                                                                     |   | X |
| 221. Jaattela et al. The efficacy of low dose metoprolol CR/ZOK in mild hypertension and in elderly patients with mild to moderate hypertension. <i>J Clin Pharmacol</i> 1990; 30: 66                                                                                                                  | X |   |
| 222. Jansson et al. Effects of doxazosin and atenolol on the fibrinolytic system in patients with hypertension and elevated serum cholesterol <i>Eur J Clin Pharmacol</i> 1991; 40: 321                                                                                                                | X |   |
| 223. Jeck et al. Betablocking drugs in essential hypertension: transdermal bupranolol compared with oral metoprolol. <i>Int J Clin Pharmacol Res</i> 1992; 12: 139                                                                                                                                     | X |   |

|                                                                                                                                                                                                                                                                              |       |   |   |
|------------------------------------------------------------------------------------------------------------------------------------------------------------------------------------------------------------------------------------------------------------------------------|-------|---|---|
| 224. Jensen et al. Efficacy and tolerability of lisinopril compared with extended release felodipine in patients with essential hypertension. Danish Cooperative Study Group. <i>Clin Exper Hyper</i> 1992; 14: 1095                                                         |       | X |   |
| 225. Johnson et al. The effects of thiazide diuretics upon plasma lipoproteins. <i>J Hypertens</i> 1986; 4: 235                                                                                                                                                              |       | X |   |
| 226. Jounela et al. Relation between low dose of hydrochlorothiazide, antihypertensive effect and adverse effects. <i>Blood Press.</i> 1994; 3: 231                                                                                                                          |       |   | X |
| 227. Jueng et al. Nifedipine GITS and hydrochlorothiazide in essential hypertension. <i>J Clin Hypertens</i> 1987; 3: 695                                                                                                                                                    |       | X |   |
| 228. Julien et al. Effects of captopril and minoxidil on left ventricular hypertrophy in resistant hypertensive patients: a 6 month double-blind comparison <i>J Am Coll Cardiol</i> 1990; 16: 137                                                                           |       | X |   |
| 229. Julius et al. Outcomes in hypertensive patients at high cardiovascular risk treated with regimens based on valsartan or amlodipine: the VALUE randomised trial. <i>Lancet</i> 2004; 363: 2022                                                                           | VALUE | X | X |
| 230. Karlberg et al. Efficacy and safety of telmisartan, a selective AT1 receptor antagonist, compared with enalapril in elderly patients with primary hypertension. TEES Study Group. <i>J Hypertension.</i> 1999; 17: 293                                                  |       |   | X |
| 231. Kavgaci et al. The effects of losartan and fosinopril in hypertensive type 2 diabetic patients. <i>Diab Res Clin Pract</i> 2002; 58: 19                                                                                                                                 |       | X |   |
| 232. Keleman et al. Exercise training combined with antihypertensive drug therapy. Effects on lipids, blood pressure, and left ventricular mass. <i>JAMA</i> 1990; 263: 2766                                                                                                 |       | X |   |
| 233. Kimura et al. Effects of celiprolol on plasma renin, aldosterone, norepinephrine and epinephrine in primary hypertension. <i>Am J Cardiol</i> 1988; 62: 751                                                                                                             |       | X |   |
| 234. Kirch et al. Efficacy and tolerability of the new calcium antagonist isradipine in essential hypertension. <i>J Cardiovasc Pharmacol</i> 1990; 15 S 1: S55                                                                                                              |       | X | X |
| 235. Kirpizidis et al. Comparative effects of fosinopril and nifedipine on regression of left ventricular hypertrophy in hypertensive patients: a double-blind study <i>Cardiovasc Drug Ther</i> 1995; 9: 141                                                                |       | X |   |
| 236. Klein et al. A double-blind comparison of metoprolol CR/ZOK 50 mg and atenolol 50 mg once daily for uncomplicated hypertension. <i>J Clin Pharmacol</i> 1990; 30: 72                                                                                                    |       | X |   |
| 237. Kloner et al. Comparative effects of candesartan cilexetil and amlodipine in patients with mild systemic hypertension. Comparison of Candesartan and Amlodipine for Safety, Tolerability and Efficacy (CASTLE) Study Investigators <i>Am J Cardiol.</i> 2001; 87.6: 727 |       |   | X |
| 238. Ko et al. Stabilization and regression of albuminuria in Chinese patients with type 2 diabetes: a one-year randomized study of valsartan versus enalapril. <i>Adv Ther</i> 2005; 22: 155                                                                                |       | X |   |
| 239. Koch et al. Co-administration of an ACE-inhibitor (moexipril) and hormonal replacement therapy in postmenopausal women. <i>J Hum Hypertens.</i> 1999; 13: 337                                                                                                           |       |   | X |
| 240. Kohlman et al. Brazilian Multicenter Study on Efficacy and Tolerability of Trandolapril in Mild-to-Moderate Essential Arterial Hypertension. EMBATHE Substudy with Ambulatory Blood Pressure Monitoring <i>Arq Bra Cardiol</i> 1999; 72: 553                            |       | X | X |
| 241. Komsuoglu et al. The effect of chronic antihypertensive therapy on the index of left ventricular mass in patients with essential hypertension <i>Int J Cardiol</i> 1989; 22: 75                                                                                         |       | X |   |
| 242. Kopf et al. A double-blind trial of perindopril and nitrendipine in incipient diabetic nephropathy. <i>Diabetes Nutr Metab</i> 2001; 14: 245                                                                                                                            |       | X |   |
| 243. Kreeft et al. Comparative trial of indapamide and hydrochlorothiazide in essential hypertension, with forearm                                                                                                                                                           |       | X |   |

|                                                                                                                                                                                                                                                              |   |   |
|--------------------------------------------------------------------------------------------------------------------------------------------------------------------------------------------------------------------------------------------------------------|---|---|
| plethysmography. <i>J Cardiovasc Pharmacol</i> 1984; 6: 622                                                                                                                                                                                                  |   |   |
| 244. Kumagai et al. Amlodipine is comparable to angiotensin-converting enzyme inhibitor for long-term renoprotection in hypertensive patients with renal dysfunction: a one-year, prospective, randomized study. <i>Am J Hypertens</i> 2000; 13: 980         | X |   |
| 245. Kuo et al. Effect of indapamide SR in the treatment of hypertensive patients with type 2 diabetes <i>Am J Hypertens</i> 2003; 16.8: 623                                                                                                                 | X |   |
| 246. Kuschnir et al. Treatment of patients with essential hypertension: amlodipine 5 mg/benazepril 20 mg compared with amlodipine 5 mg, benazepril 20 mg, and placebo. <i>Clin Ther.</i> 1996; 18: 1213                                                      |   | X |
| 247. Lacourciere et al. A multicenter, randomized, double-blind study of the antihypertensive efficacy and tolerability of irbesartan in patients aged > or = 65 years with mild to moderate hypertension. <i>Clin Ther.</i> 2000; 22.1: 1213                |   | X |
| 248. Lacourciere et al. Antihypertensive effect of isradipine administered once or twice daily on ambulatory blood pressure <i>Am J Cardiol</i> 1990; 65: 467                                                                                                | X | X |
| 249. Lacourciere et al. Comparative effects of a new cardioselective beta-blocker nebivolol and nifedipine sustained-release on 24-hour ambulatory blood pressure and plasma lipoproteins <i>J Clin Pharmacol</i> 1992; 32: 660                              | X | X |
| 250. Lacourciere et al. Comparison of amlodipine and captopril in hypertension based on 24-hour ambulatory monitoring. <i>J Cardiovasc Pharmacol</i> 1993; 22: 20                                                                                            | X | X |
| 251. Lacourciere et al. Influence of zofenopril and low doses of hydrochlorothiazide on plasma lipoproteins in patients with mild to moderate essential hypertension. <i>Am J Hypertens</i> 1989; 2: 861                                                     | X | X |
| 252. Lacourciere et al. Long-term comparison of losartan and enalapril on kidney function in hypertensive type 2 diabetics with early nephropathy. <i>Hypertension</i> 1993; 21: 786                                                                         | X | X |
| 253. Langenfeld et al. Antihypertensive efficacy and orthostatic tolerance of bunazosin vs nitrendipine: a multicentre double-blind randomized controlled study. <i>J Hum Hypertens.</i> 1996; 10: 831                                                       |   | X |
| 254. Leenen et al. Patterns of compliance with once versus twice daily antihypertensive drug therapy in primary care: a randomized clinical trial using electronic monitoring. <i>Can j Cardiol.</i> 1997; 13: 914                                           |   | X |
| 255. Lefebvre et al. Comparative effects of felodipine ER, amlodipine and nifedipine GITS on 24 h blood pressure control and trough to peak ratios in mild to moderate ambulatory hypertension: a forced titration study. <i>Can j Cardiol</i> 1998; 14: 682 | X |   |
| 256. Lehtonen et al. Comparison of sustained release verapamil and hydrochlorothiazide in hypertension--effect on blood pressure and metabolic variables. <i>Int J Clin Pharmacol Ther Toxicol</i> 1987; 25: 301                                             | X |   |
| 257. Lejeune et al. Effects of BAY I 5240, a fixed combination of low dose nifedipine and acebutolol on hypertension: comparison with standard dose nifedipine. <i>Eur J Clin Pharmacol</i> 1985; 28: 17                                                     | X |   |
| 258. Leon et al. Efficacy and safety of enalapril versus extended-release nifedipine for the treatment of mild-to-moderate essential hypertension: a multicenter 22-week study. Multicenter Cooperative Study Group. <i>Clin Ther</i> 1993; 15: 1094         | X |   |
| 259. Leon et al. Efficacy and safety of enalapril versus extended-release nifedipine for the treatment of mild-to-moderate essential hypertension: a multicenter 22-week study. Multicenter Cooperative Study Group. <i>Clin Ther.</i> 1993; 15: 1094        |   | X |
| 260. Leonetti et al. Comparison of the effects on blood pressure and left ventricular hypertrophy of lacidipine and hydrochlorothiazide in hypertensive patients <i>J Hypertens</i> 1991; 9 S 3: S29                                                         | X |   |
| 261. Leonetti et al. Effects of blood pressure reduction with trandolapril and enalapril on left ventricular hypertrophy and exercise tolerance. <i>J Hypertens</i> 1993; 11: 5356                                                                           | X |   |

|                                                                                                                                                                                                                                                                                                                 |       |   |   |
|-----------------------------------------------------------------------------------------------------------------------------------------------------------------------------------------------------------------------------------------------------------------------------------------------------------------|-------|---|---|
| 262. Leonetti et al. Effects of nilvadipine and amlodipine in patients with mild to moderate essential hypertension: a double blind, prospective, randomised clinical trial <i>Curr Med Res Opin</i> 2005; 21.6: 951                                                                                            |       | X |   |
| 263. Lerch et al. Metabolic effects of temocapril in hypertensive patients with diabetes mellitus type 2. <i>J Cardiovasc Pharmacol.</i> 1999; 33: 527                                                                                                                                                          |       |   | X |
| 264. Lessem et al. Long-term enalapril--a new converting enzyme inhibitor--in the treatment of mild to moderate essential hypertension, results of a worldwide multiclinic study. Comparing two ways of analyzing data. <i>Clin Exper Theory Pract</i> 1985; A7: 1515                                           |       | X |   |
| 265. Levine et al. Additive effects of verapamil and enalapril in the treatment of mild to moderate hypertension. <i>Am J Hypertens.</i> 1995; 8: 494                                                                                                                                                           |       |   | X |
| 266. Li et al. A comparison of initial treatment with losartan/HCTZ versus losartan monotherapy in Chinese patients with mild to moderate essential hypertension. <i>Int J Clin Pract</i> 2003; 27.8: 673                                                                                                       |       | X |   |
| 267. Licata et al. Medium-term double-blind study of indenolol in hypertensive patients: clinical hemodynamic, and echocardiographic correlates. <i>Curr Ther Res</i> 1989; 46: 103                                                                                                                             |       | X |   |
| 268. Lithell et al. The Study on Cognition and Prognosis in the Elderly (SCOPE): principal results of a randomized double-blind intervention trial. <i>J Hypertens</i> 2003; 21: 875                                                                                                                            | SCOPE | X |   |
| 269. Liu et al. The Felodipine Event Reduction (FEVER) Study: a randomized long-term placebo-controlled trial in Chinese hypertensive patients <i>J Hypertens</i> 2005; 23: 2157                                                                                                                                | FEVER | X |   |
| 270. Lombardo et al. Efficacy and safety evaluation of lacidipine compared with amlodipine in mild-to-moderate hypertensive patients. <i>J Cardiovasc Pharmacol</i> 1994; 23 s 5: S98                                                                                                                           |       | X |   |
| 271. Lonn et al. Effects of ramipril and vitamin E on atherosclerosis: the study to evaluate carotid ultrasound changes in patients treated with ramipril and vitamin E (SECURE). <i>Circulation</i> 2001; 103: 919                                                                                             |       | X |   |
| 272. Lopez et al. Nitrendipine and atenolol in essential hypertension in young and middle-aged patients: effect on serum lipids and left ventricular mass. <i>J Cardiovasc Pharmacol</i> 1991; 18: 101                                                                                                          |       | X | X |
| 273. Louis et al. Use of computerized neuropsychological tests (CANTAB) to assess cognitive effects of antihypertensive drugs in the elderly. Cambridge Neuropsychological Test Automated Battery. <i>J Hypertens</i> 1999; 17: 1813                                                                            |       | X |   |
| 274. Luccione et al. An equivalence study of the safety and efficacy of a fixed-dose combination of perindopril with indapamide versus fixed-dose combinations of captopril with hydrochlorothiazide and enalapril with hydrochlorothiazide in the treatment of hypertension. <i>J Hypertens</i> 1995; 13: 1847 |       | X |   |
| 275. Mace et al. Regression of left ventricular hypertrophy in hypertension: comparative effects of three different drugs. <i>J Cardiovasc Pharmacol</i> 1985; 7 S2: S52                                                                                                                                        |       | X |   |
| 276. Mackay et al. Losartan and low-dose hydrochlorothiazide in patients with essential hypertension. A double-blind, placebo-controlled trial of concomitant administration compared with individual components. <i>Arch Intern Med</i> 1996; 156: 278                                                         |       | X |   |
| 277. Mackay et al. Losartan and low-dose hydrochlorothiazide in patients with essential hypertension. A double-blind, placebo-controlled trial of concomitant administration compared with individual components. <i>Arch Intern Med.</i> 1996; 156: 278                                                        |       |   | X |
| 278. Maclean et al. Comparison of once daily atenolol, nitrendipine and their combination in mild to moderate essential hypertension. <i>Br J Clin Pharmacol.</i> 1990; 29: 455                                                                                                                                 |       |   | X |
| 279. Madsen et al. Effects of the calcium antagonist felodipine on renal haemodynamics, tubular sodium handling, and blood                                                                                                                                                                                      |       | X |   |

|                                                                                                                                                                                                                                                                                                                 |   |   |
|-----------------------------------------------------------------------------------------------------------------------------------------------------------------------------------------------------------------------------------------------------------------------------------------------------------------|---|---|
| pressure in cyclosporin-treated dermatological patients. <i>Nephrol Dial transplant</i> 1997; 12: 480                                                                                                                                                                                                           |   |   |
| 280. Maharaj et al. A comparative study of isradipine SRO and enalapril in black patients with mild-to-moderate hypertension. <i>Am J Hypertens</i> .1993; 6: 80s                                                                                                                                               |   | X |
| 281. Malacco et al. A randomized, double-blind, active-controlled, parallel-group comparison of valsartan and amlodipine in the treatment of isolated systolic hypertension in elderly patients: the Val-Syst study. <i>Clin Ther</i> 2003; 25.11: 2765                                                         | X | X |
| 282. Malacco et al. Comparison of valsartan 160 mg with lisinopril 20 mg, given as monotherapy or in combination with a diuretic, for the treatment of hypertension: the Blood Pressure Reduction and Tolerability of Valsartan in Comparison with Lisinopril (PREVAIL) study. <i>Clin Ther</i> 2004; 26.6: 855 | X | X |
| 283. Malacco et al. Effects of valsartan/hydrochlorothiazide and amlodipine on ambulatory blood pressure and plasma norepinephrine levels in high-risk hypertensive patients. <i>Adv Therapy</i> 2004; 21.3: 149                                                                                                | X |   |
| 284. Malatino et al. Comparison of ketanserin and enalapril in the treatment of mild-to-moderate essential hypertension. <i>Cardiovasc Drug Ther</i> 1990; 4: 123                                                                                                                                               | X |   |
| 285. Malik et al. Effect of angiotensin-converting-enzyme (ACE) inhibitor trandolapril on human diabetic neuropathy: randomised double-blind controlled trial. <i>Lancet</i> 1998; 352: 1978                                                                                                                    | X |   |
| 286. Mallion et al. Antihypertensive efficacy and tolerability of once daily losartan potassium compared with captopril in patients with mild to moderate essential hypertension. <i>J Hypertens</i> 1995; 13 s 1: s35                                                                                          | X |   |
| 287. Mallion et al. Valsartan, a new angiotensin II antagonist; blood pressure reduction in essential hypertension compared with an angiotensin converting enzyme inhibitor, enalapril. <i>Blood Press Monit</i> 1997; 2: 179                                                                                   | X |   |
| 288. Man In't Veld et al. Isradipine twice daily lowers blood pressure over 24 H. <i>Am J Hypertens</i> 1991; 4: 131S                                                                                                                                                                                           | X | X |
| 289. Manolis et al. Effects of losartan and candesartan monotherapy and losartan/hydrochlorothiazide combination therapy in patients with mild to moderate hypertension. Losartan Trial Investigators. <i>Clin Ther</i> 2000; 22.1: 1186                                                                        | X |   |
| 290. Manolis et al. Isradipine versus captopril in patients with essential hypertension. <i>Clin Ther</i> 1995; 17: 648                                                                                                                                                                                         | X |   |
| 291. Marfin R et al. on behalf of the investigators of the ESPIRAL Study. <i>J Hypertens</i> . 2001; 19: 1871-1876.                                                                                                                                                                                             | X |   |
| 292. Marre et al. Equivalence of indapamide SR and enalapril on microalbuminuria reduction in hypertensive patients with type 2 diabetes: the NESTOR Study. <i>J Hypertens</i> 2004; 22: 1613                                                                                                                   | X | X |
| 293. Martina et al. Effects of losartan titrated to losartan/hydrochlorothiazide and amlodipine on blood pressure and peripheral capillary microcirculation in patients with mild-to-moderate hypertension <i>J Hum Hypertens</i> 1998; 12.7: 473                                                               | X |   |
| 294. Martina et al. The effects of mibefradil and enalapril on 24-hour blood pressure control and left ventricular mass in patients with mild to moderate hypertension: double-blind, randomized trial. <i>J Cardiovasc Pharmacol</i> 1999; 33.4: 647                                                           | X |   |
| 295. Massie et al. Diltiazem and propranolol in mild to moderate essential hypertension as monotherapy or with hydrochlorothiazide. <i>Ann Intern Med</i> 1987; 107: 150                                                                                                                                        | X |   |
| 296. Materson et al. Dose response to chlorthalidone in patients with mild hypertension. Efficacy of a lower dose. <i>Clin Pharmacol Ther</i> .1978; 24: 192                                                                                                                                                    |   | X |
| 297. Mathiesen et al. Efficacy of captopril in postponing nephropathy in normotensive insulin dependent diabetic patients with microalbuminuria. <i>BMJ</i> 1991; 303: 81                                                                                                                                       | X |   |
| 298. Mazzola et al. Antihypertensive and hemodynamic effects of slow-release nifedipine. <i>Int J Clin Pharmacol Ther Toxicol</i> 1988; 26: 503                                                                                                                                                                 | X | X |

|                                                                                                                                                                                                                                                                                  |       |   |   |
|----------------------------------------------------------------------------------------------------------------------------------------------------------------------------------------------------------------------------------------------------------------------------------|-------|---|---|
| 299. Mccarron et al. 24-hour blood pressure profiles in hypertensive patients administered ramipril or placebo once daily: magnitude and duration of antihypertensive effects. Ramipril Multicenter Study Group. <i>Clin Cardiol</i> .1991; 14: 737                              |       |   | X |
| 300. Mccorvey et al. Effect of hydrochlorothiazide, enalapril, and propranolol on quality of life and cognitive and motor function in hypertensive patients. <i>Clin Pharm</i> 1993; 12: 300                                                                                     |       | X |   |
| 301. Mcfate et al. Use of diuretics in treatment of hypertension in the elderly. <i>Drugs</i> .1986; 31: 154                                                                                                                                                                     |       |   | X |
| 302. Mcfate-Smith et al. Treatment of mild hypertension: results of a ten-year intervention trial. <i>Circ Res</i> 1977; 40 S 1: 98                                                                                                                                              | USPHS | X |   |
| 303. McGill et al. Telmisartan plus hydrochlorothiazide versus telmisartan or hydrochlorothiazide monotherapy in patients with mild to moderate hypertension: a multicenter, randomized, double-blind, placebo-controlled, parallel-group trial. <i>Clin Ther</i> .2001; 23: 833 |       |   | X |
| 304. Mcinnes et al. Cardiovascular responses to verapamil and propranolol in hypertensive patients. <i>J Hypertens</i> 1985; 3s3: 219                                                                                                                                            |       | X | X |
| 305. Mcinnes et al. The efficacy and tolerability of candesartan cilexetil in an elderly hypertensive population <i>J Hum Hypertens</i> 1997; 11 s 2: S75                                                                                                                        |       | X |   |
| 306. McMahan et al. The relationship of dose to the antihypertensive response of verapamil-sustained release in patients with mild to moderate essential hypertension. The Verapamil-SR Study Group. <i>J Clin Pharmacol</i> .1989; 29: 1003                                     |       |   | X |
| 307. Mcveigh et al. The case for low dose diuretics in hypertension: comparison of low and conventional doses of cyclopentiazide. <i>BMJ</i> 1988; 297: 95                                                                                                                       |       | X | X |
| 308. Meeves et al. The use of confidence intervals to describe the precision of trough/peak ratios for diltiazem CD in the treatment of hypertension. <i>J Clin Pharmacol</i> .1994; 34: 231                                                                                     |       |   | X |
| 309. Mehlsen et al. Beneficial effect of isradipine on the development of left ventricular hypertrophy in mild hypertension. <i>Am J Hypertens</i> 1993; 6: 95S                                                                                                                  |       | X |   |
| 310. Mengden et al. Comparison of casual, ambulatory and self-measured blood pressure in a study of nitrendipine vs bisoprolol. <i>Eur J Clin Pharmacol</i> 1992; 42: 569                                                                                                        |       | X |   |
| 311. Messerli et al. Effects of verapamil and trandolapril in the treatment of hypertension. Trandolapril Study Group. <i>Am J Hypertens</i> .1998; 11: 322                                                                                                                      |       |   | X |
| 312. Middlemost et al. Effectiveness of enalapril in combination with low-dose hydrochlorothiazide versus enalapril alone for mild to moderate systemic hypertension in black patients. <i>Am J Cardiol</i> 1994; 73: 1092                                                       |       | X |   |
| 313. Migdalis et al. Effect of fosinopril sodium on early carotid atherosclerosis in diabetic patients with hypertension. <i>J Med</i> 1997; 28: 371                                                                                                                             |       | X |   |
| 314. Mitchell et al. Omapatrilat reduces pulse pressure and proximal aortic stiffness in patients with systolic hypertension: results of the conduit hemodynamics of omapatrilat international research study. <i>Circulation</i> 2002; 105: 2955                                |       | X |   |
| 315. Mogensen et al. Effect of low-dose perindopril/indapamide on albuminuria in diabetes: preterax in albuminuria regression: PREMIER. <i>Hypertension</i> 2003; 41: 1063                                                                                                       |       | X |   |
| 316. Mohanty et al. Isradipine (PN 200-110) versus hydrochlorothiazide in mild to moderate hypertension. A multicenter study. <i>Am J Hypertens</i> .1988; 1: 241s                                                                                                               |       |   | X |
| 317. Morgan et al. ACE inhibitors, beta-blockers, calcium blockers, and diuretics for the control of systolic hypertension. <i>Am J Hypertens</i> .2001; 14: 241                                                                                                                 |       |   | X |
| 318. Morris et al. Effects of the calcium antagonist lacidipine on insulin sensitivity in essential hypertension. A placebo-controlled                                                                                                                                           |       | X |   |



|                                                                                                                                                                                                                                                                                                               |                |          |
|---------------------------------------------------------------------------------------------------------------------------------------------------------------------------------------------------------------------------------------------------------------------------------------------------------------|----------------|----------|
| study. <i>Horm Metab Res</i> 1994; 26: 257                                                                                                                                                                                                                                                                    |                |          |
| 319. Mosconi et al. Nitrendipine and enalapril improve albuminuria and glomerular filtration rate in non-insulin dependent diabetes. <i>Kidney Int Suppl</i> 1996; 55: S91                                                                                                                                    | X              |          |
| 320. Moser et al. Nitrendipine in the treatment of mild to moderate hypertension. <i>J Cardiovasc Pharmacol.</i> 1984; 6 S 6: 1085                                                                                                                                                                            |                | X        |
| 321. Moser et al. The effects of benazepril, a new angiotensin-converting enzyme inhibitor, in mild to moderate essential hypertension: a multicenter study. <i>Clin Pharmacol Ther.</i> 1991; 49: 322                                                                                                        |                | X        |
| 322. Mounier-Vehier et al. Compliance and antihypertensive efficacy of amlodipine compared with nifedipine slow-release. <i>Am J Hypertens</i> 1998; 11: 478                                                                                                                                                  | X              |          |
| 323. Mroczek et al. Dose-finding study of cilazapril (Inhibace) in patients with uncomplicated essential hypertension. <i>Clin Exp Hypertens.</i> 1991; A13: 1415                                                                                                                                             |                | X        |
| 324. Muiesan et al. Antihypertensive efficacy and tolerability of captopril in the elderly: comparison with hydrochlorothiazide and placebo in a multicentre, double-blind study. <i>J Hypertens</i> 1987; 5s5: 599                                                                                           | X              |          |
| 325. Murdoch et al. A comparative trial of lisinopril and nifedipine in mild to moderate hypertension in general practice. <i>NZ Med J</i> 1992; 105: 260                                                                                                                                                     | X              | X        |
| 326. Murray et al. A comparative trial of lisinopril and nifedipine in mild to moderate hypertension in general practice. <i>Br J Clin Pract.</i> 1996; 50: 368                                                                                                                                               |                | X        |
| 327. Nakamura et al. Combination therapy of trandolapril and candesartan cilexetil reduces microalbuminuria and urinary endothelin-1 excretion in patients with type 2 diabetes <i>Clin Exp Nephrol</i> 2002; 6: 135                                                                                          | X              |          |
| 328. Nakamura et al. Comparison between the angiotensin II receptor antagonist candesartan cilexetil and the angiotensin-converting enzyme inhibitor trandolapril in microalbuminuria of patients with early diabetic nephropathy. <i>Nephron</i> 2000; 86: 247                                               | X              |          |
| 329. National Intervention Cooperative Study in Elderly Hypertensives Study Group et al. Randomized double-blind comparison of a calcium antagonist and a diuretic in elderly hypertensives. National Intervention Cooperative Study in Elderly Hypertensives Study Group. <i>Hypertension</i> 1999; 34: 1129 | NICS           | X        |
| 330. Nelson et al. Antihypertensive activity of isradipine in humans: a new dihydropyridine calcium channel antagonist. <i>Clin Pharmacol Ther.</i> 1986; 40: 694                                                                                                                                             |                | X        |
| 331. Neutel et al. Efficacy and tolerability of tasosartan, a novel angiotensin II receptor blocker: Results from a 10-week, double-blind, placebo-controlled, dose-titration study. <i>Am Heart J.</i> 1999; 137: 118                                                                                        |                | X        |
| 332. Neutel et al. Novel delivery system for verapamil designed to achieve maximal blood pressure control during the early morning. <i>Am Heart J.</i> 1996; 132: 1202                                                                                                                                        |                | X        |
| 333. Nicaise et al. Antihypertensive efficacy and safe use of once-daily sustained-release diltiazem in the elderly: a comparison with captopril. The Dilcacom Study Group <i>J Intern Med Res.</i> 1995; 23: 244                                                                                             |                | X        |
| 334. Nielsen et al. Impact of lisinopril and atenolol on kidney function in hypertensive NIDDM subjects with diabetic nephropathy. <i>Diabetes.</i> 1994; 43: 1108                                                                                                                                            |                | X        |
| 335. Nielsen et al. Losartan reduces albuminuria in patients with essential hypertension. An enalapril controlled 3 months study. <i>Nephrol Dial Transplant</i> 1997; 12 s 2: 19                                                                                                                             | X              |          |
| 336. Nissen SE et al for the CAMELOT investigators. Effect of antihypertensive agents on cardiovascular events in patients with                                                                                                                                                                               | <b>CAMELOT</b> | <b>X</b> |

|                                                                                                                                                                                                                                                                                                        |   |   |
|--------------------------------------------------------------------------------------------------------------------------------------------------------------------------------------------------------------------------------------------------------------------------------------------------------|---|---|
| <i>coronary disease and normal blood pressure. JAMA 2004; 292: 2217</i>                                                                                                                                                                                                                                |   |   |
| 337. Norgaard et al. A comparison of spirapril and isradipine in patients with diabetic nephropathy and hypertension. <i>Blood Press</i> 1993; 2: 301                                                                                                                                                  | X |   |
| 338. O'Donnell et al. Comparison of the effects of an angiotensin converting enzyme inhibitor and a calcium antagonist in hypertensive, macroproteinuric diabetic patients: a randomised double-blind study. <i>J Hum Hypertens</i> 1993; 7: 333                                                       | X |   |
| 339. O'Hare et al. Low-dose ramipril reduces microalbuminuria in type 1 diabetic patients without hypertension: results of a randomized controlled trial. <i>Diab Care</i> 2000; 23 (12): 1823                                                                                                         | X |   |
| 340. Ollivier et al. Antihypertensive efficacy of optimally titrated doses of once-daily sustained-release diltiazem: a placebo-controlled trial. DILPLACOMP Study Group <i>Cardiology</i> .1995; 86: 481                                                                                              |   | X |
| 341. Omboni et al. Antihypertensive efficacy of lercanidipine at 2.5, 5 and 10 mg in mild to moderate essential hypertensives assessed by clinic and ambulatory blood pressure measurements. Multicenter Study Investigators. <i>J Hypertens</i> .1998; 16: 1831                                       |   | X |
| 342. Oparil et al. Efficacy, tolerability, and effects on quality of life of losartan, alone or with hydrochlorothiazide, versus amlodipine, alone or with hydrochlorothiazide, in patients with essential hypertension <i>Clin Ther</i> 1996; 18.4: 608                                               | X | X |
| 343. Opie et al. Efficacy and tolerability of nisoldipine coat-core formulation in the treatment of essential hypertension: The South African Multicenter ANCHOR Study. Ambulatory Nisoldipine Coat-Core Hypertension Outpatient Response (ANCHOR) Investigators. <i>Am J Hypertens</i> .1997; 10: 250 |   | X |
| 344. Ostergren et al. Quality of life in hypertensive patients treated with either carvedilol or enalapril <i>Blood Press</i> 1996; 5: 41                                                                                                                                                              | X |   |
| 345. Ott et al. Multicenter, double-blind comparison of doxazosin and atenolol in patients with mild to moderate hypertension. <i>Am J Cardiol</i> .1987; 59: 73                                                                                                                                       |   | X |
| 346. Otterstad et al. Changes in left ventricular dimensions and systolic function in 100 mildly hypertensive men during one year's treatment with atenolol vs. hydrochlorothiazide and amiloride (Moduretic): a double-blind, randomized study. <i>J intern Med</i> 1992; 231: 493                    | X |   |
| 347. Palatini et al. A multicenter, randomized double-blind study of valsartan/hydrochlorothiazide combination versus amlodipine in patients with mild to moderate hypertension. <i>J Hypertens</i> 2001; 19.9: 1691                                                                                   | X | X |
| 348. Palermo et al. Nitrendipine once daily compared with nifedipine in the treatment of mild to moderate hypertension. <i>Clin Ther</i> 1990; 12: 149                                                                                                                                                 | X |   |
| 349. Pandita-Gunawardena et al. Amlodipine lowers blood pressure without affecting cerebral blood flow as measured by single photon emission computed tomography in elderly hypertensive subjects <i>Age Ageing</i> 1999; 28.5: 451                                                                    | X |   |
| 350. Pannarale et al. Effects of slow-release verapamil and nitrendipine on office and 24-hour ambulatory blood pressure in hypertensive patients. <i>J Cardiovasc Pharmacol</i> 1992; 19: 53                                                                                                          | X |   |
| 351. Pannarale et al. Twenty-four-hour antihypertensive efficacy of felodipine 10 mg extended-release: the Italian inter-university study. <i>J Cardiovasc Pharmacol</i> 1996; 27: 255                                                                                                                 | X |   |
| 352. Paolisso et al. Losartan mediated improvement in insulin action is mainly due to an increase in non-oxidative glucose metabolism and blood flow in insulin-resistant hypertensive patients. <i>J Hum Hypertens</i> 1997; 11: 307                                                                  | X |   |
| 353. Parving et al. Protection of kidney function and decrease in albuminuria by captopril in insulin dependent diabetics with nephropathy. <i>BMJ</i> 1988; 297: 1086                                                                                                                                 | X |   |

|                                                                                                                                                                                                                                            |      |   |   |
|--------------------------------------------------------------------------------------------------------------------------------------------------------------------------------------------------------------------------------------------|------|---|---|
| 354. PATS et al. Post-stroke antihypertensive treatment study. A preliminary result. PATS Collaborating Group <i>Chin Med J</i> 1995; 108: 710                                                                                             | PATS | X |   |
| 355. Perez-Stable et al. The effects of propranolol on cognitive function and quality of life: a randomized trial among patients with diastolic hypertension. <i>Am J Med</i> 2000; 108: 359                                               |      | X |   |
| 356. Perticone et al. Amlodipine versus ramipril in the treatment of mild to moderate hypertension: evaluation by 24-hour ambulatory blood pressure monitoring <i>Cardiology</i> 1994; 85: 36                                              |      | X | X |
| 357. Perticone et al. Evaluation of antihypertensive effects of once-a-day isradipine and fosinopril: a double-blind crossover study by means of ambulatory blood pressure monitoring. <i>Clin Cardiol</i> 1995; 18: 401                   |      | X | X |
| 358. Pickering et al. Comparison of antihypertensive and hormonal effects of captopril and propranolol at rest and during exercise <i>Am J Cardiol</i> 1982; 49: 1566                                                                      |      | X |   |
| 359. Pittrow et al. Evaluation of the efficacy and tolerability of a low-dose combination of isradipine and spirapril in the first-line treatment of mild to moderate essential hypertension. <i>Cardiovasc Drug Ther.</i> 1997; 11.5: 619 |      |   | X |
| 360. Pizarro et al. Placebo-controlled comparison of the efficacy and tolerability of once-daily moxonidine and enalapril in mild to moderate essential hypertension. <i>Revista Portuguesa de Cardiologia</i> 1996; 15.6: 495             |      | X |   |
| 361. Pollare et al. A comparison of the effects of hydrochlorothiazide and captopril on glucose and lipid metabolism in patients with hypertension. <i>NEJM</i> 1989; 321: 868                                                             |      | X |   |
| 362. Polonia et al. Lisinopril and diltiazem reduce left ventricular mass without changing blood pressure in normotensive subjects with exaggerated blood pressure response to exercise. <i>Rev Port cardiol</i> 1996; 15: 185             |      | X |   |
| 363. Poncelet et al. A double-blind, randomized, comparative study of nitrendipine and enalapril in elderly hypertensive patients. <i>J Cardiovasc Pharmacol</i> 1991; 18: 67                                                              |      | X |   |
| 364. Pool et al. A randomized, controlled trial comparing diltiazem, hydrochlorothiazide, and their combination in the therapy of essential hypertension. <i>Pharmacotherapy.</i> 1993; 13: 487                                            |      |   | X |
| 365. Pool et al. Aliskiren, an orally effective renin inhibitor, provides antihypertensive efficacy alone and in combination with val <i>Am J Hypertens</i> 2007; 20.1: 11                                                                 |      | X | X |
| 366. Pool et al. Once-daily treatment of patients with hypertension: a placebo-controlled study of amlodipine and benazepril vs amlodipine or benazepril alone. <i>J Hum Hypertens.</i> 2001; 15: 495                                      |      |   | X |
| 367. Porcellati et al. Ambulatory blood pressure monitoring during sustained treatment with conventional and extended-release felodipine in mild-to-moderate hypertension. <i>Eur J Clin Pharmacol</i> 1989; 37: 555                       |      | X |   |
| 368. Pasma et al. Sustained-release diltiazem versus metoprolol in stable angina pectoris <i>Eur Heart J</i> 1989; 10: 923                                                                                                                 |      | X |   |
| 369. Poulsen et al. Lisinopril reduces albuminuria during exercise in low grade microalbuminuric type 1 diabetic patients: a double blind randomized study. <i>J Int med</i> 2001; 249: 433                                                |      | X |   |
| 370. Prager et al. Antihypertensive efficacy of cilazapril 2.5 and 5.0 mg once-daily versus placebo on office blood pressure and 24-hour blood pressure profile. <i>J Cardiovasc Pharmacol</i> 1994; 24 S 3 : S93                          |      | X | X |
| 371. Prichard et al. Placebo-controlled comparison of the efficacy and tolerability of once-daily moxonidine and enalapril in mild to moderate essential hypertension. [Article in German] <i>Blood Press</i> 2002; 11.3: 166              |      | X | X |
| 372. Prisant et al. Assessment of electrocardiographic ischemia in hypertensive patients treated with isradipine or placebo. <i>J Clin Pharmacol</i> 1991; 31: 233                                                                         |      | X | X |

|                                                                                                                                                                                                                                                                    |   |
|--------------------------------------------------------------------------------------------------------------------------------------------------------------------------------------------------------------------------------------------------------------------|---|
| 373. Prisant et al. Low-dose drug combination therapy: an alternative first-line approach to hypertension treatment. <i>Am Heart J</i> .1995; 130: 359                                                                                                             | X |
| 374. Radevski et al. Antihypertensive monotherapy with nisoldipine CC is superior to enalapril in black patients with severe hypertension. <i>Am J hypertens</i> 1999; 12: 194                                                                                     | X |
| 375. Ragot et al. Comparison of three blood pressure measurement methods for the evaluation of two antihypertensive drugs: feasibility, agreement, and reproducibility of blood pressure response. <i>Am J Hypertens</i> 2000; 13: 632                             | X |
| 376. Rajzer et al. Effect of amlodipine, quinapril, and losartan on pulse wave velocity and plasma collagen markers in patients with mild-to-moderate arterial hypertension <i>Am J Hypertens</i> 2003; 16.6: 439                                                  | X |
| 377. Reif et al. Effects of candesartan cilexetil in patients with systemic hypertension. Candesartan Cilexetil Study Investigators. <i>Am J Cardiol</i> .1998; 82.8: 961                                                                                          | X |
| 378. Rizzini et al. Efficacy and safety of lacidipine, a new long-lasting calcium antagonist, in elderly hypertensive patients. <i>J Cardiovasc Pharmacol</i> 1991; 17 S 4: S38                                                                                    | X |
| 379. Rizzoni et al. Effect of treatment with candesartan or enalapril on subcutaneous small artery structure in hypertensive patients with noninsulin-dependent diabetes mellitus. <i>Hypertension</i> 2005; 45: 659                                               | X |
| 380. Roca-Cusachs et al. A randomized, double-blind comparison of the antihypertensive efficacy and safety of once-daily losartan compared to twice-daily captopril in mild to moderate essential hypertension <i>Acta Cardiol</i> .1997; 52.6: 495                | X |
| 381. Romero et al. Comparative effects of captopril versus nifedipine on proteinuria and renal function of type 2 diabetic patients. <i>Diab Res Clin Pract</i> 1992; 17: 191                                                                                      | X |
| 382. Romero et al. Renal function changes in microalbuminuric normotensive type II diabetic patients treated with angiotensin-converting enzyme inhibitors. <i>Diabetes Care</i> 1993; 16: 597                                                                     | X |
| 383. Romito et al. Comparative effect of lercanidipine, felodipine, and nifedipine GITS on blood pressure and heart rate in patients with mild to moderate arterial hypertension: the Lercanidipine in Adults (LEAD) Study. <i>J Clin Hypertens</i> 2003; 5.4: 249 | X |
| 384. Rorive et al. [Comparative study of the efficacy and tolerance of perindopril, a new converting enzyme inhibitor and of atenolol, a beta blocker] <i>Rev Med Liege (French)</i> 1990; 45.2: 62                                                                | X |
| 385. Rudberg et al. Effect of angiotensin converting enzyme inhibitor or beta blocker on glomerular structural changes in young microalbuminuric patients with Type I (insulin-dependent) diabetes mellitus. <i>Diabetologia</i> 1999; 42: 589                     | X |
| 386. Ruggenenti et al. Preventing microalbuminuria in type 2 diabetes <i>NEJM</i> 2004; 351: 1941                                                                                                                                                                  | X |
| 387. Ruilope et al. Controlled trial of losartan given concomitantly with different doses of hydrochlorothiazide in hypertensive patients. <i>Blood Press</i> 1996; 5: 32                                                                                          | X |
| 388. Rumboldt et al. Controlled multicentre comparison of captopril versus lisinopril in the treatment of mild-to-moderate arterial hypertension. <i>Int J Clin Pharmacol Res</i> 1993; 13: 35                                                                     | X |
| 389. Sadowski et al. Regression of left ventricular hypertrophy in hypertensive patients after 1 year of treatment with rilmenidine: a double-blind, randomized, controlled (versus nifedipine) study. <i>J Hypertens Suppl</i> 1998; 16: 55                       | X |
| 390. Sakata et al. Differential effects of enalapril and nitrendipine on the fibrinolytic system in essential hypertension. <i>Am Heart J</i> 1999; 137: 1094                                                                                                      | X |
| 391. Sakata et al. Effects of losartan and its combination with quinapril on the cardiac sympathetic nervous system and                                                                                                                                            | X |

|                                                                                                                                                                                                                                                                                                                                                              |       |   |
|--------------------------------------------------------------------------------------------------------------------------------------------------------------------------------------------------------------------------------------------------------------------------------------------------------------------------------------------------------------|-------|---|
| neurohormonal status in essential hypertension. <i>J Hypertens</i> 2002; 20.1: 103                                                                                                                                                                                                                                                                           |       |   |
| 392. Salako et al. Evaluation of lacidipine (a calcium blocker) in the treatment of hypertension in black African people: a double-blind comparison with hydrochlorothiazide. <i>Afr J Med Sci</i> 1998; 27: 73                                                                                                                                              | X     |   |
| 393. Salonen et al. Comparison of two doses of betaxolol and placebo in hypertension: a randomized, double-blind cross-over trial. <i>Eur J Clin Pharmacol</i> .1982; 23: 491                                                                                                                                                                                |       | X |
| 394. Salvetti et al. Antihypertensive effect of slow-release nicardipine. A placebo-controlled cross-over study. <i>Eur J Clin Pharmacol</i> .1989; 36: 439                                                                                                                                                                                                  |       | X |
| 395. Sambol et al. Effect of hydrochlorothiazide 25 mg/day on essential hypertension. <i>Clin Pharm</i> 1990; 9: 873                                                                                                                                                                                                                                         | X     |   |
| 396. Samra et al. Comparison of the efficacy, safety and tolerability of telmisartan with losartan in Indian patients with mild to moderate hypertension: a pilot study <i>J Indian Med Assoc</i> 2003; 101.5: 327                                                                                                                                           | X     |   |
| 397. Sassano et al. Antihypertensive effect of enalapril as first-step treatment of mild and moderate uncomplicated essential hypertension. Evaluation by two methods of blood pressure measurement. <i>Am J Med</i> 1984; 77 s 2a: 18                                                                                                                       | X     |   |
| 398. Sassano et al. Treatment of mild to moderate hypertension with or without the converting enzyme inhibitor enalapril. Results of a six-month double-blind trial. <i>Am J Med</i> 1987; 83: 227                                                                                                                                                           | X     |   |
| 399. Saunders et al. A comparison of the efficacy and safety of a beta-blocker, a calcium channel blocker, and a converting enzyme inhibitor in hypertensive blacks. <i>Arch Intern Med</i> .1990; 150: 1707                                                                                                                                                 |       | X |
| 400. Schaller et al. Double-blind comparison of indapamide with a placebo in hypertensive patients treated by practicing physicians. <i>Clin Exp Hypertens</i> .1985; A7: 985                                                                                                                                                                                |       | X |
| 401. Schmidt et al. Antihypertensive effects of valsartan/hydrochlorothiazide combination in essential hypertension. <i>Blood Press</i> 2001; 10.4: 230                                                                                                                                                                                                      | X     |   |
| 402. Schmieder et al. Obesity as a determinant for response to antihypertensive treatment. <i>BMJ</i> 1993; 307: 537                                                                                                                                                                                                                                         | X     |   |
| 403. Schmitz et al. Effects of felodipine on urinary albumin excretion and metabolic control in hypertensive non-insulin-dependent diabetics. <i>Am J Hypertens</i> 1990; 3: 611                                                                                                                                                                             | X     |   |
| 404. Schneeweiss et al. The effect of cilazapril, 2.5 to 5.0 mg and hydrochlorothiazide, 25 to 50 mg, on diastolic cardiac function was studied by echocardiography and radionuclide ventriculography, using a double-blind randomized parallel-group design with a placebo run-in period, in 30 hypertensive patients.. <i>J Hum Hypertens</i> 1990; 4: 535 | X     |   |
| 405. Schobel et al. Treatment and post-treatment effects of alpha- versus beta-receptor blockers on left ventricular structure and function in essential hypertension. <i>Am Heart J</i> 1996; 132: 1004                                                                                                                                                     | X     |   |
| 406. Schoenberger et al. [Cilazapril in essential hypertension. A placebo-controlled double-blind study to establish the dosage] <i>J Hypertens</i> 1995; 13.1: 43                                                                                                                                                                                           | X     | X |
| 407. Schrader et al. Morbidity and Mortality After Stroke, Eprosartan Compared with Nitrendipine for Secondary Prevention: principal results of a prospective randomized controlled study (MOSES) <i>Stroke</i> 2005; 36: 1218                                                                                                                               | MOSES | X |
| 408. Scognamiglio et al. Evaluation of the efficacy and tolerability of nitrendipine in reducing both pressure and left ventricular mass in hypertensive type 2 diabetic patients. <i>Diabetes Care</i> 1997; 20.8: 1290                                                                                                                                     | X     |   |
| 409. Seedat et al. A comparison of lisinopril and atenolol in black and Indian patients with mild-to-moderate essential hypertension. <i>S Afr Med J</i> 1987; 71: 149                                                                                                                                                                                       | X     |   |
| 410. Semplicini et al. Cerebral perfusion in hypertensives with carotid artery stenosis: a comparative study of lacidipine and                                                                                                                                                                                                                               | X     |   |

|                                                                                                                                                                                                                                                                      |      |   |   |
|----------------------------------------------------------------------------------------------------------------------------------------------------------------------------------------------------------------------------------------------------------------------|------|---|---|
| hydrochlorothiazide. <i>Blood Press</i> 2000; 9: 34                                                                                                                                                                                                                  |      |   |   |
| 411. Sheiban et al. Regression of cardiac hypertrophy after antihypertensive therapy with nifedipine and captopril <i>J Cardiovasc Pharmacol</i> 1987; 10s10: s187                                                                                                   |      | X |   |
| 412. SHEP et al. Prevention of stroke by antihypertensive drug treatment in older persons with isolated systolic hypertension. Final results of the Systolic Hypertension in the Elderly Program (SHEP). SHEP Cooperative Research Group <i>JAMA</i> 1991; 265: 3255 | SHEP | X | X |
| 413. Shiba et al. Delapril versus manidipine in hypertensive therapy to halt the type-2-diabetes-mellitus-associated nephropathy. <i>Diabetes Res Clin Pract</i> 2000; 47: 97                                                                                        |      | X |   |
| 414. Siewert-Delle et al. Effects of intensified blood-pressure reduction on renal function and albumin excretion in primary hypertension. Addition of felodipine or ramipril to long-term treatment with beta-blockade. <i>Am J Hypertens</i> 1995; 8: 113          |      | X |   |
| 415. Silagy et al. Crossover comparison of atenolol, enalapril, hydrochlorothiazide and isradipine for isolated systolic systemic hypertension <i>Am J Cardiol</i> 1992; 70: 1299                                                                                    |      | X | X |
| 416. Simon et al. Increased renal plasma flow in long-term enalapril treatment of hypertension. <i>Clin Pharmacol Ther</i> 1983; 34: 459                                                                                                                             |      | X |   |
| 417. Sluiter et al. Felodipine in hypertensive patients. A dose finding study in patients refractory to beta-blocker monotherapy. <i>Drugs</i> 1987; 34 s 3: 97                                                                                                      |      | X | X |
| 418. Smith et al. Differential effects of calcium channel blockers on size selectivity of proteinuria in diabetic glomerulopathy. <i>Kidney Int</i> 1998; 54: 889                                                                                                    |      | X | X |
| 419. Smith et al. Dose response and safety of telmisartan in patients with mild to moderate hypertension. <i>J Clin Pharmacol</i> .2000; 40: 1380                                                                                                                    |      |   | X |
| 420. Smith et al. Once-daily monotherapy with trandolapril in the treatment of hypertension. <i>J Hum Hypertens</i> 1996; 10: 129                                                                                                                                    |      | X |   |
| 421. Soberman et al. The safety and efficacy of once-daily dilevalol in patients with mild hypertension: a placebo-controlled study. <i>J Clin Hypertens</i> .1987; 3: 271                                                                                           |      |   | X |
| 422. Sorensen et al. Effects of nisoldipine and lisinopril on microvascular dysfunction in hypertensive Type I diabetes patients with nephropathy <i>Clin Sci (Lond)</i> 1998; 98: 709                                                                               |      | X |   |
| 423. Soro et al. The effects of nicardipine on sodium and calcium metabolism in hypertensive patients: a chronic study. <i>J Clin Pharmacol</i> 1990; 30: 133                                                                                                        |      | X |   |
| 424. Stamler et al. Initial antihypertensive drug therapy--a comparison of alpha-blocker (prazosin) and diuretic (hydrochlorothiazide). Brief summary of a randomized, controlled trial. <i>Am J Med</i> 1989; 86: 24                                                |      | X |   |
| 425. Starr et al. A double-blind trial of captopril or bendrofluazide in newly diagnosed senile hypertension. <i>Curr Med Res Opin</i> .1994; 13: 214                                                                                                                |      |   | X |
| 426. Starr et al. The effects of antihypertensive treatment on cognitive function: results from the HOPE study. <i>J Am Geriatr Soc</i> 1996; 44: 411                                                                                                                |      | X |   |
| 427. Stimpel et al. Antihypertensive treatment in postmenopausal women: results from a prospective, randomized, double-blind, controlled study comparing an ACE inhibitor (moexipril) with a diuretic (hydrochlorothiazide). <i>Cardiology</i> .1998; 89: 271        |      |   | X |
| 428. Stornello et al. Persistent albuminuria in normotensive non-insulin-dependent (type II) diabetic patients: comparative effects of angiotensin-converting enzyme inhibitors and beta-adrenoceptor blockers. <i>Clin Sci</i> 1992; 82: 19                         |      | X |   |

|                                                                                                                                                                                                                                        |      |   |   |
|----------------------------------------------------------------------------------------------------------------------------------------------------------------------------------------------------------------------------------------|------|---|---|
| 429. Stumpe et al. Comparison of the angiotensin II receptor antagonist irbesartan with atenolol for treatment of hypertension <i>Blood Press.</i> 1998; 7.1: 31                                                                       |      |   | X |
| 430. Taddei et al. Combination of lisinopril and nifedipine GITS increases blood pressure control compared with single drugs in essential hypertensive patients. <i>J Cardiovasc Pharmacol</i> 2003; 44: 579                           |      |   | X |
| 431. Takabatake et al. Effect of atenolol or enalapril on diurnal changes of blood pressure in Japanese mild to moderate hypertensives: a double-blind, randomised, crossover trial <i>J Hum Hypertens</i> 1991; 5: 199                |      |   | X |
| 432. Talseth et al. A long-term study of atenolol and doxazosin in mild and moderate hypertension <i>J Hum Hypertens.</i> 1990; 4 s 3: 39                                                                                              |      |   | X |
| 433. Tan et al. Effects of angiotensin II receptor antagonist on endothelial vasomotor function and urinary albumin excretion in type 2 diabetic patients with microalbuminuria <i>Diab/Metab Res rev</i> 2002; 18: 71                 |      |   | X |
| 434. Tan et al. Efficacy and tolerability of doxazosin versus enalapril in the treatment of patients with mild-to-moderate hypertension. <i>Clin Ther</i> 1997; 19: 459                                                                |      |   | X |
| 435. Tedesco et al. Comparison of losartan and hydrochlorothiazide on cognitive function and quality of life in hypertensive patients. <i>Am J Hypertens</i> 1999; 12: 1130                                                            |      | X | X |
| 436. Tedesco et al. Effects of losartan on hypertension and left ventricular mass: a long-term study. <i>J Hum Hypertens</i> 1998; 12: 505                                                                                             |      | X | X |
| 437. Teo et al. Long-term effects of cholesterol lowering and angiotensin-converting enzyme inhibition on coronary atherosclerosis: The Simvastatin/Enalapril Coronary Atherosclerosis Trial (SCAT) <i>Circulation</i> 2000; 102: 1748 | SCAT | X |   |
| 438. Terpstra et al. Effects of amlodipine and lisinopril on intima-media thickness in previously untreated, elderly hypertensive patients (the ELVERA trial). <i>J Hypertens</i> 2004; 22: 1309                                       |      | X |   |
| 439. Testa et al. Assessment of quality of life by patient and spouse during antihypertensive therapy with atenolol and nifedipine gastrointestinal therapeutic system. <i>Am J Hypertens.</i> 1991; 4: 363                            |      |   | X |
| 440. Tettamanti et al. Effects of ramipril (R) and Nitrendipine (N) on proteinuria in hypertensive patients with albuminuric NIDDM. <i>J Hypertens</i> 1992; 10S4: 102                                                                 |      | X |   |
| 441. Thurig et al. Lisinopril is neutral to insulin sensitivity and serum lipoproteins in essential hypertensive patients. <i>Eur J Clin Pharmacol</i> 1995; 49: 21                                                                    |      | X | X |
| 442. Thurmman et al. Influence of the angiotensin II antagonist valsartan on left ventricular hypertrophy in patients with essential hypertension. <i>Circulation</i> 1998; 98: 2037                                                   |      | X |   |
| 443. Tikkanen et al. Comparison of the angiotensin II antagonist losartan with the angiotensin converting enzyme inhibitor enalapril in patients with essential hypertension. <i>J Hypertens</i> 1995; 13: 1343                        |      | X |   |
| 444. Trafford et al. A multi-centre, placebo controlled comparative study between 200 mg and 400 mg celiprolol in patients with mild to moderate essential hypertension. <i>Curr Med Res Opin</i> 1989; 11: 550                        |      | X |   |
| 445. Trenkwalder et al. Antihypertensive treatment with candesartan cilexetil does not affect glucose homeostasis or serum lipid profile in patients with mild hypertension and type II diabetes. <i>Blood Press</i> 1998; 7: 170      |      | X | X |
| 446. Trevisan et al. Effects of moderate salt restriction alone and in combination with cilazapril on office and ambulatory blood pressure. <i>Am J Hypertens</i> 1995; 8.9: 876                                                       |      | X |   |
| 447. Tutuncu et al. Efficacy of ACE inhibitors and ATII receptor blockers in patients with microalbuminuria: a prospective study.                                                                                                      |      | X |   |

|                                                                                                                                                                                                                                  |         |   |   |
|----------------------------------------------------------------------------------------------------------------------------------------------------------------------------------------------------------------------------------|---------|---|---|
| <i>Acta Diabet</i> 2001; 38: 157                                                                                                                                                                                                 |         |   |   |
| 448. Tzemos et al. Nebivolol reverses endothelial dysfunction in essential hypertension: a randomized, double-blind, crossover study. <i>Circulation</i> 2001; 104: 511                                                          |         | X |   |
| 449. Uchiyama-Tanaka et al. Comparison of the effects of quinapril and losartan on carotid artery intima-media thickness in patients with mild-to-moderate arterial hypertension. <i>Kidney Blood Press Res</i> 2005; 28: 111    |         | X |   |
| 450. UKPDS et al. Efficacy of atenolol and captopril in reducing risk of macrovascular and microvascular complications in type 2 diabetes: UKPDS 39. UK Prospective Diabetes Study Group <i>BMJ</i> 1998; 317: 713               | UKPDS39 | X | X |
| 451. Uusitupa et al. Dose finding studies with imidapril--a new ACE inhibitor. <i>J Hum Hypertens</i> 1996; 10.5: 319                                                                                                            |         | X |   |
| 452. Van Bortel et al. Quality of life and antihypertensive effect with nebivolol and losartan <i>Am J Hypertens</i> .2005; 18: 1060                                                                                             |         |   | X |
| 453. van de Ven et al. Prophylactic treatment of migraine with bisoprolol: a placebo-controlled study. <i>Cephalgia</i> 1997; 17: 596                                                                                            |         | X |   |
| 454. Van Dijk et al. Diltiazem in comparison with metoprolol in stable angina pectoris. <i>Eur Heart J</i> 1988; 9: 1194                                                                                                         |         | X |   |
| 455. van Essen et al. Are angiotensin converting enzyme inhibitors superior to beta blockers in retarding progressive renal function decline? <i>Kidney Int Suppl</i> 1997; 63: S58                                              |         | X |   |
| 456. Vaughan et al. Volume factor in low and normal renin essential hypertension. Treatment with either spironolactone or chlorthalidone. <i>Am J Cardiol</i> 1973; 32: 523                                                      |         | X |   |
| 457. Veerman et al. Effects of lisinopril and amlodipine on ambulatory pressure, blood pressure variability, and systemic hemodynamics in elderly hypertensive patients. <i>J Cardiovasc Pharmacol</i> 1994; 24 s B: S12         |         | X |   |
| 458. Velussi et al. Effects of cilazapril and amlodipine on kidney function in hypertensive NIDDM patients. <i>Diabetes</i> 1996; 45: 216                                                                                        |         | X |   |
| 459. Venter et al. [The effect of enalapril and prazosin on mild to moderate hypertension in black South Africans] <i>S Afr Med J</i> 1991; 80: 324                                                                              |         | X |   |
| 460. Venter et al. The effects of xipamide on mild-moderate hypertension in black South Africans - results of a clinical trial. <i>Med Sci Res</i> 1991; 19: 217                                                                 |         | X |   |
| 461. Verdecchia et al. Duration of the antihypertensive action of atenolol, enalapril and placebo: a randomized within-patient study using ambulatory blood pressure monitoring. <i>Int J Clin Pharmacol Ther</i> 1988; 26: 570  |         | X |   |
| 462. Verdecchia et al. Duration of the antihypertensive action of atenolol, enalapril and placebo: a randomized within-patient study using ambulatory blood pressure monitoring. <i>Int J Clin Pharmacol Ther</i> .1988; 26: 570 |         |   | X |
| 463. Viberti et al. Microalbuminuria reduction with valsartan in patients with type 2 diabetes mellitus: a blood pressure-independent effect <i>Circulation</i> 2002; 106: 672                                                   |         | X |   |
| 464. Villamil et al. Renin inhibition with aliskiren provides additive antihypertensive efficacy when used in combination with hydrochlorothiazide. <i>J Hypertens</i> .2007; 25: 217                                            |         |   | X |
| 465. Vyssoulis et al. Effect of beta-blockade on exercise capacity in hypertensive subjects: a one-year double-blind study of celiprolol and metoprolol <i>Cardiovasc Drug Ther</i> 1995; 9: 133                                 |         | X |   |
| 466. Vyssoulis et al. Left ventricular and aortic root structure and function changes with beta blocker antihypertensive therapy. A one-year double blind study of celiprolol and metoprolol. <i>Int J Cardiol</i> 1995; 49: 45  |         | X |   |
| 467. Waeber et al. Amlodipine compared to nitrendipine in hypertensive patients: the effects on toleration in relationship to the onset of action. <i>Cardiology</i> 1992; 80 S 1: 46                                            |         | X | X |
| 468. Wang et al. Comparison of the effects of nitrendipine and captopril on the regression of hypertensive left ventricular                                                                                                      |         | X |   |



|                                                                                                                                                                                                                                                                       |   |   |
|-----------------------------------------------------------------------------------------------------------------------------------------------------------------------------------------------------------------------------------------------------------------------|---|---|
| hypertrophy. <i>Chin Med J</i> 1991; 104: 645                                                                                                                                                                                                                         |   |   |
| 469. Wang et al. Parallel comparative trial of amlodipine and nitrendipine monotherapy in patients with essential hypertension. <i>J Hypertens Suppl</i> 1998; 16: 43                                                                                                 | X |   |
| 470. Watts et al. Comparison of felodipine and enalapril monotherapy in essential hypertension. <i>Blood Pressure</i> .1993; 2: 53                                                                                                                                    |   | X |
| 471. Webster et al. Once daily amlodipine in the treatment of mild to moderate hypertension. <i>Br J Clin Pharmacol</i> .1987; 24: 713                                                                                                                                |   | X |
| 472. Weidler et al. Efficacious response with lower dose indapamide therapy in the treatment of elderly patients with mild to moderate hypertension. <i>J Clin Pharmacol</i> .1995; 35: 45                                                                            |   | X |
| 473. Weir et al. A comparison of the efficacy and tolerability of enalapril and sustained-release diltiazem in mild to moderate essential hypertension. <i>Clin Ther</i> .1990; 12: 473                                                                               |   | X |
| 474. Weir et al. A noninferiority comparison of valsartan/hydrochlorothiazide combination versus amlodipine in black hypertensives <i>Hypertension</i> 2005; 46: 508                                                                                                  | X | X |
| 475. Weir et al. Comparison of the efficacy and metabolic effects of nifedipine and hydrochlorothiazide in hypertensive black men and women. <i>J Hum Hypertens</i> .1993; 7: 141                                                                                     |   | X |
| 476. Weir et al. Comparison of the efficacy and tolerability of Prinivil and Procardia XL in black and white hypertensive patients. <i>Clin Ther</i> .1992; 14: 730                                                                                                   |   | X |
| 477. Weir et al. Efficacy and tolerability of enalapril and sustained-release verapamil in older patients with mild to moderate essential hypertension. <i>Clin Ther</i> 1990; 12: 139                                                                                | X | X |
| 478. Weir et al. Efficacy, tolerability, and quality of life of losartan, alone or with hydrochlorothiazide, versus nifedipine GITS in patients with essential hypertension. <i>Clin Ther</i> 1996; 18: 411                                                           | X | X |
| 479. Weir et al. Sustained-release diltiazem compared with atenolol monotherapy for mild to moderate systemic hypertension. <i>Am J Cardiol</i> .1987; 60: 36                                                                                                         |   | X |
| 480. Weiss et al. Diltiazem-induced left ventricular mass regression in hypertensive patients <i>J Clin Hypertens</i> 1987; 3: 135                                                                                                                                    | X |   |
| 481. Wessels et al. Double-blind comparison of doxazosin and enalapril in patients with mild or moderate essential hypertension. <i>Am Heart J</i> 1991; 121: 299                                                                                                     | X | X |
| 482. Wester et al. Felodipine extended release in mild to moderate hypertension. <i>Curr Med Res Opin</i> 1991; 12: 275                                                                                                                                               | X | X |
| 483. Wetzchewald et al. Regression of left ventricular hypertrophy during long-term antihypertensive treatment--a comparison between felodipine and the combination of felodipine and metoprolol. <i>J Intern Med</i> 1992; 231: 303                                  | X |   |
| 484. Whelton et al. Twenty-four hour blood pressure effect of once-daily lisinopril, enalapril, and placebo in patients with mild to moderate hypertension. <i>J Hum Hypertens</i> .1992; 6: 325                                                                      |   | X |
| 485. White et al. Preventing increases in early-morning blood pressure, heart rate, and the rate-pressure product with controlled onset extended release verapamil at bedtime versus enalapril, losartan, and placebo on arising. <i>Am Heart J</i> .2002; 144.4: 657 |   | X |
| 486. White et al. The effects of the long-acting angiotensin-converting enzyme inhibitor cilazapril on casual, exercise, and ambulatory blood pressure. <i>Clin Pharmacol Ther</i> 1988; 44 s 3: 173                                                                  | X |   |
| 487. Wiklund et al. Effect of controlled release/extended release metoprolol on carotid intima-media thickness in patients with hypercholesterolemia: a 3-year randomized study. <i>Stroke</i> 2002; 33: 572                                                          | X |   |
| 488. Wikstrand et al. Antihypertensive treatment with metoprolol or hydrochlorothiazide in patients aged 60 to 75 years. Report from a double-blind international multicenter study. <i>JAMA</i> 1986; 255: 1304                                                      | X |   |

|                                                                                                                                                                                                                                                                                      |   |   |
|--------------------------------------------------------------------------------------------------------------------------------------------------------------------------------------------------------------------------------------------------------------------------------------|---|---|
| 489. Wikstrand et al. Primary prevention with metoprolol in patients with hypertension. Mortality results from the MAPHY study. <i>JAMA</i> 1988; 259: 1976                                                                                                                          | X |   |
| 490. Winer et al. Placebo-controlled trial of once-a-day isradipine monotherapy in mild to moderately severe hypertension. <i>J Clin Pharmacol</i> 1990; 30: 1006                                                                                                                    | X | X |
| 491. Wing et al. Lacidipine, hydrochlorothiazide and their combination in systolic hypertension in the elderly. <i>J Hypertens</i> .1997; 15: 1503                                                                                                                                   |   | X |
| 492. Wolfson et al. Diltiazem and captopril alone or in combination for treatment of mild to moderate systemic hypertension. <i>Am J Cardiol</i> 1988; 62: 103G                                                                                                                      | X | X |
| 493. Wright et al. Effect of blood pressure lowering and antihypertensive drug class on progression of hypertensive kidney disease: results from the AASK trial. <i>JAMA</i> 2002; 288: 2421                                                                                         | X |   |
| 494. Yasunari et al. Comparative effects of valsartan versus amlodipine on left ventricular mass and reactive oxygen species formation by monocytes in hypertensive patients with left ventricular hypertrophy. <i>J Am Coll Cardiol</i> 2004; 43: 2116                              | X |   |
| 495. Zachariah et al. Antihypertensive effects of a new sustained-release formulation of nifedipine. <i>J Clin Pharmacol</i> 1990; 30: 1012                                                                                                                                          | X | X |
| 496. Zachariah et al. Verapamil and 24-hour ambulatory blood pressure monitoring in essential hypertension <i>Am J Cardiol</i> 1986; 57: 74D                                                                                                                                         | X |   |
| 497. Zanchetti et al. Comparison of candesartan versus enalapril in essential hypertension. Italian Candesartan Study Group. <i>Am J Hypertens</i> .2001; 14: 129                                                                                                                    |   | X |
| 498. Zanchetti et al. Efficacy, tolerability, and impact on quality of life of long-term treatment with manidipine or amlodipine in patients with essential hypertension <i>J Cardiovasc Pharmacol</i> 2001; 38.4: 642                                                               | X | X |
| 499. Zanchetti et al. The Verapamil in Hypertension and Atherosclerosis Study (VHAS): results of long-term randomized treatment with either verapamil or chlorthalidone on carotid intima-media thickness. <i>J Hypertens</i> 1998; 16: 1667                                         | X | X |
| 500. Zannad et al. Ambulatory 24-h blood pressure assessment of the felodipine-metoprolol combination versus amlodipine in mild to moderate hypertension. Lorraine General Physician Investigators Group. <i>J Hypertension</i> 1999; 17: 1023                                       | X |   |
| 501. Zannad et al. Double-blind, randomized, multicentre comparison of the effects of amlodipine and perindopril on 24 h therapeutic coverage and beyond in patients with mild to moderate hypertension. General Physicians Investigators' Group. <i>J Hypertens</i> 1999; 17.1: 137 | X |   |
| 502. Zito et al. Effects of antihypertensive therapy with lacidipine on ambulatory blood pressure in the elderly. <i>J Hypertens</i> 1991; 9 S: S79                                                                                                                                  | X |   |
| 503. Zuchelli et al. Comparison of the effects of ACE inhibitors and calcium channel blockers on the progression of renal failure. <i>Nephrol Dial Transplant</i> 1995; 10: 46                                                                                                       | X |   |
